# Supplementary material for: Comparative analysis of SNP candidates in disparate milk yielding river buffaloes using targeted sequencing
Source: PeerJ journal article supplement (doi:10.7717/peerj.2147), 2016-07-07
Supplement: Supp_Figure_3.pdf [file Supp_Figure_3.pdf]

Supplementary figure 3

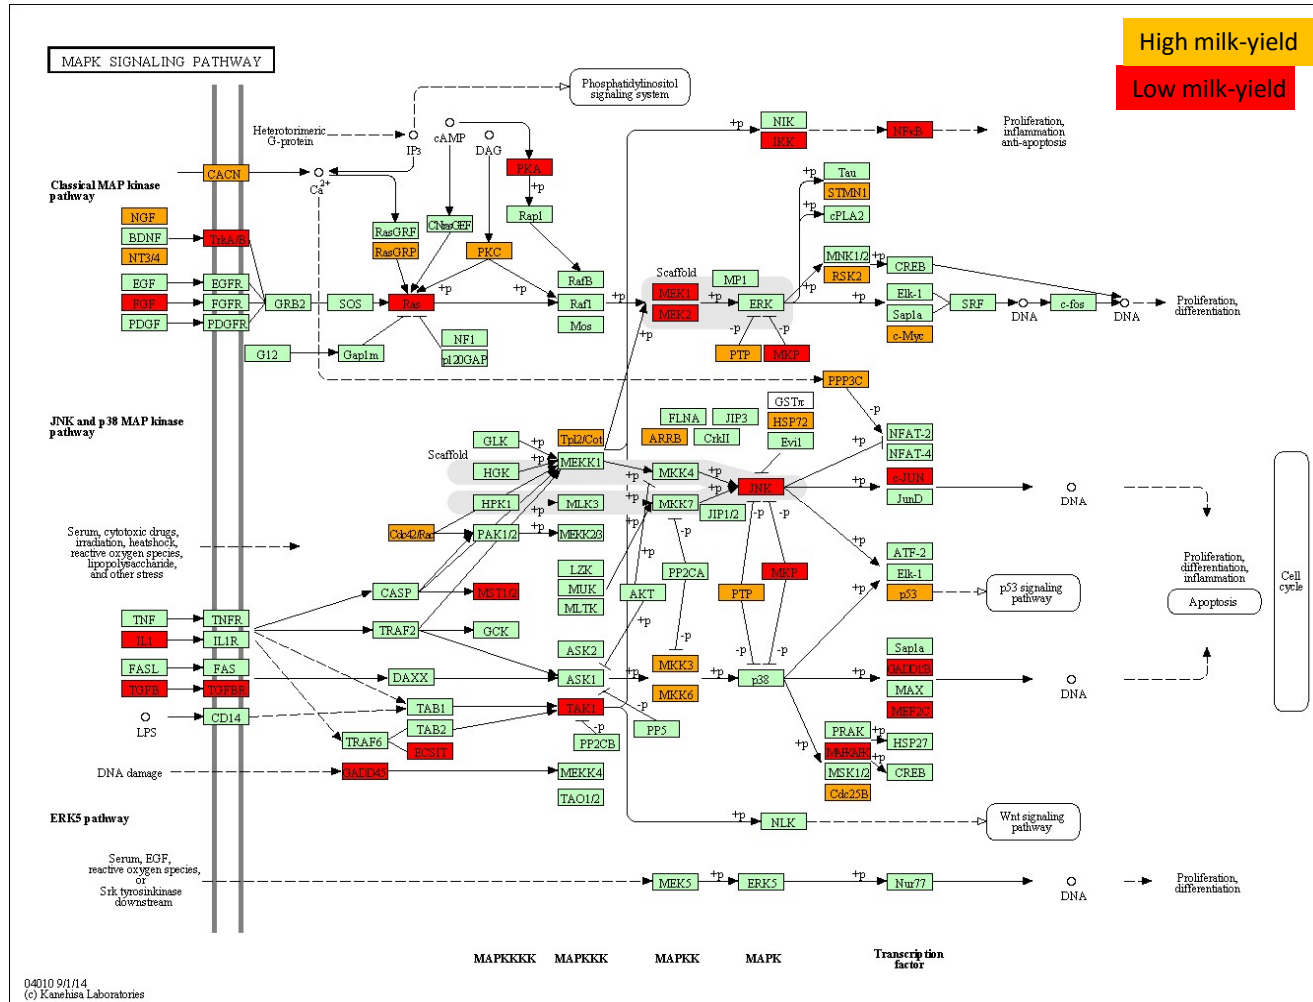

Supplementary figure 3 : MAPK signaling pathway
