# Supplementary material for: Comparative analysis of SNP candidates in disparate milk yielding river buffaloes using targeted sequencing
Source: PeerJ. 2016 Jul 7;4:e2147. doi: 10.7717/peerj.2147 (PMC4941740; doi:10.7717/peerj.2147)
Supplement: Supplemental Information 1 [file peerj-04-2147-s001.xlsx]

## Sheet: Supp_Table 1
Supplementary Table 1: Assessment of on-target capturing efficiency for milk production. Total 156,337 (31.19 Mb) regions were targeted by in-solution hybridization method.
Sample ID	Targets covered	Target bases covered (Mb)	% of target covered	Average sequencing depth
BHP1	110417	22.03	70.63	6.64
BHP2	112207	22.39	71.77	6.98
BLP1	98935	19.74	63.28	5.15
BLP2	102321	20.41	65.45	5.95
MHP1	105022	20.95	67.18	5.67
MHP2	114538	22.85	73.26	6.85
MLP2	109680	21.88	70.16	6.12
MLP5	98162	19.58	62.79	4.78
JHP1	102001	20.35	65.24	4.95
JHP2	103630	20.68	66.29	5.16
JLP1	119505	23.84	76.44	7.3
JLP2	116091	23.16	74.26	6.67
AVERAGE	107709	21.15	67.8	6.02
