# Supplementary material for: Comparative analysis of SNP candidates in disparate milk yielding river buffaloes using targeted sequencing
Source: PeerJ. 2016 Jul 7;4:e2147. doi: 10.7717/peerj.2147 (PMC4941740; doi:10.7717/peerj.2147)
Supplement: Supplemental Information 4 [file peerj-04-2147-s004.xlsx]

## Sheet: Supp_Table 4
Supplemetary table 4 : DEG in mammary transcriptome analysis of high vs low milk yield
Gene_Symbol	GB_ACC	Remark	ID	P.Value	Fold Change
SFRS4	NM_001101231	REFSEQ_MRNA	10679	0.00150068	-19.5326
ACHE	NM_001076220	REFSEQ_MRNA	2273	0.00032484	-10.529
CD164L2	NM_001076180	REFSEQ_MRNA	22323	0.00264431	-9.82083
RPS29	NM_174804	REFSEQ_MRNA	44909	0.00130311	-9.42307
NDUFB1	NM_175809	REFSEQ_MRNA	19592	0.00261419	-7.92873
STRN3	NM_001098042	REFSEQ_MRNA	17619	0.00531887	-7.7126
CETN3	NM_001075976	REFSEQ_MRNA	21096	0.00025798	-7.64833
OGG1	NM_001080285	REFSEQ_MRNA	19055	0.00573699	-6.86037
DSTN	NM_001015586	REFSEQ_MRNA	7163	3.733e-05	-6.69148
KCNK3	XM_002691458	REFSEQ_MRNA_PREDICTED	10295	0.00379216	-6.00704
TMEM59L	NM_001075301	REFSEQ_MRNA	9029	0.00249111	-5.98295
KIAA0930	XM_002687978	REFSEQ_MRNA_PREDICTED	29257	0.00399541	-5.88731
EIF4E2	NM_001075795	REFSEQ_MRNA	5718	3.6e-06	-5.77961
ARL5B	XM_868768	REFSEQ_MRNA_PREDICTED	41255	0.00763625	-5.7106
OTOA	XM_002698021	REFSEQ_MRNA_PREDICTED	37193	0.00755081	-5.61542
LHFPL4	NM_001076226	REFSEQ_MRNA	30033	0.00035709	-5.24821
NOP10	NM_001114521	REFSEQ_MRNA	33311	0.00857739	-5.15329
TMCO5A	NM_001076467	REFSEQ_MRNA	31278	0.00598036	-5.08245
MPHOSPH6	NM_001075564	REFSEQ_MRNA	4649	0.00569714	-5.07224
GNG5	NM_174811	REFSEQ_MRNA	43894	0.00088184	-5.05457
DYNLRB1	NM_001034442	REFSEQ_MRNA	33007	5.44e-06	-4.93321
CACNG1	NM_001080337	REFSEQ_MRNA	3957	0.00148401	-4.93131
COX8A	NM_174024	REFSEQ_MRNA	37061	0.00120904	-4.92082
RHOU	NM_001098147	REFSEQ_MRNA	42542	0.00164425	-4.83745
MAPKAP1	NM_001081603	REFSEQ_MRNA	15059	0.00013951	-4.83257
SHPRH	XM_002690300	REFSEQ_MRNA_PREDICTED	13687	0.00028713	-4.80085
GAR1	NM_001035303	REFSEQ_MRNA	32163	0.00881733	-4.77217
NUPR1L	NM_001040574	REFSEQ_MRNA	23678	0.00251318	-4.57748
VWA2	XM_002698512	REFSEQ_MRNA_PREDICTED	35604	0.00477521	-4.3452
SCN11A	XM_002696919	REFSEQ_MRNA_PREDICTED	27026	0.00021993	-4.17031
AKR1B1	AB098903	EMBL	10747	0.00115667	-4.08963
ATRIP	NM_001103330	REFSEQ_MRNA	39686	0.00073726	-4.05855
RUNX2	XM_002684501	REFSEQ_MRNA_PREDICTED	41185	0.00460931	-4.0161
TBC1D14	NM_001099176	REFSEQ_MRNA	40762	0.00030801	-4.01133
COX6C	BC126788	EMBL	15113	0.00310802	-4.00723
ATXN7L2	NM_001102255	REFSEQ_MRNA	39322	0.00135672	-3.94726
MRPS24	NM_001046601	REFSEQ_MRNA	11654	0.00114989	-3.92088
BTC	NM_173896	REFSEQ_MRNA	34620	0.00268756	-3.82659
NME3	NM_001098986	REFSEQ_MRNA	27679	0.00014443	-3.79329
GABARAPL2	NM_174675	REFSEQ_MRNA	30981	0.00170645	-3.71704
COX7A2	NM_175807	REFSEQ_MRNA	11517	0.00616568	-3.70927
NMB	NM_001075270	REFSEQ_MRNA	1687	0.00100137	-3.6952
CREBBP	NM_001164022	REFSEQ_MRNA	6120	0.00595328	-3.66778
FANCB	XM_868591	REFSEQ_MRNA_PREDICTED	25274	0.00071518	-3.64658
ABCB10	XM_002698768	REFSEQ_MRNA_PREDICTED	24276	0.00030806	-3.60785
BCNT	NM_174800	REFSEQ_MRNA	6691	4.055e-05	-3.59992
RERGL	NM_001105472	REFSEQ_MRNA	33139	0.00987616	-3.50743
NFE2L1	NM_001102515	REFSEQ_MRNA	35511	0.00153036	-3.50477
BTG1	NM_173999	REFSEQ_MRNA	25750	8.895e-05	-3.50106
ATP5G2	NM_176613	REFSEQ_MRNA	23075	0.00043142	-3.4979
UBB	NM_174133	REFSEQ_MRNA	22651	0.00757825	-3.49788
SPRY4	NM_001081512	REFSEQ_MRNA	42057	0.0018139	-3.45587
PWWP2B	NM_001075856	REFSEQ_MRNA	14737	0.00450081	-3.45106
KRAS	NM_001110001	REFSEQ_MRNA	32554	0.00603144	-3.44399
PAPPA2	XM_002694100	REFSEQ_MRNA_PREDICTED	4674	0.00855837	-3.39999
TM4SF5	NM_001046102	REFSEQ_MRNA	18491	0.00533392	-3.39459
NLRP5	NM_001007814	REFSEQ_MRNA	11056	0.00128089	-3.38962
DNAJC15	NM_001080332	REFSEQ_MRNA	21238	0.00029824	-3.38707
PTPN1	NM_001100326	REFSEQ_MRNA	39626	0.00057405	-3.38471
ZCCHC9	NM_001101055	REFSEQ_MRNA	24918	0.00028377	-3.37466
RASAL2	XM_002694157	REFSEQ_MRNA_PREDICTED	15935	0.00344576	-3.35875
SHOC2	NM_001101943	REFSEQ_MRNA	24507	0.0004294	-3.34796
MATN4	NM_001098865	REFSEQ_MRNA	24998	0.00255336	-3.33262
IMP3	NM_001079588	REFSEQ_MRNA	38046	0.00536239	-3.2626
EMD	NM_203361	REFSEQ_MRNA	14826	0.00130262	-3.26022
TM2D1	NM_001079593	REFSEQ_MRNA	32144	0.005608	-3.24533
CPNE3	NM_001099142	REFSEQ_MRNA	6556	0.00653574	-3.24459
PPP1R32	NM_001038044	REFSEQ_MRNA	30544	0.0004258	-3.23941
ENDOG	NM_175823	REFSEQ_MRNA	3502	0.00109177	-3.23477
RPS21	NM_001040581	REFSEQ_MRNA	36846	0.00107004	-3.18857
MYO9A	XM_593333	REFSEQ_MRNA_PREDICTED	39234	0.00249797	-3.18606
MGC140823	NM_001075517	REFSEQ_MRNA	32728	0.00016663	-3.17709
MRPL41	NM_001099365	REFSEQ_MRNA	15473	0.00266082	-3.16939
KIAA1958	XM_876102	REFSEQ_MRNA_PREDICTED	26325	0.00327635	-3.15977
STX16	XM_866367	REFSEQ_MRNA_PREDICTED	25240	0.00481292	-3.14016
SNUPN	NM_001038546	REFSEQ_MRNA	7771	0.00047942	-3.13236
TCHP	NM_001164026	REFSEQ_MRNA	38984	0.00017132	-3.12551
BRWD1	NM_001103174	REFSEQ_MRNA	21408	0.00677911	-3.12285
GSK3B	NM_001101310	REFSEQ_MRNA	8428	0.00152133	-3.08796
CAPRIN1	NM_001076062	REFSEQ_MRNA	37868	0.00143767	-3.08614
EDEM1	NM_001103092	REFSEQ_MRNA	42885	0.00835291	-3.07811
RPS27L	NM_001040578	REFSEQ_MRNA	33403	0.00254757	-3.04334
TSGA10IP	NM_001098009	REFSEQ_MRNA	29334	0.00103332	-3.02546
SRC	NM_001110804	REFSEQ_MRNA	2988	0.0016711	-3.02079
VCL	BC120206	EMBL	34601	0.0099689	-2.99165
MPST	NM_001034291	REFSEQ_MRNA	40896	0.00184638	-2.97457
ACN9	NM_001080352	REFSEQ_MRNA	44745	0.00231581	-2.94728
CCDC85B	NM_001144087	REFSEQ_MRNA	17971	6.671e-05	-2.94453
RPL34	BC103314	EMBL	1736	0.00436468	-2.92925
M-RIP	NM_001105627	REFSEQ_MRNA	25870	0.00549846	-2.92923
P97BCNT2	NM_001077919	REFSEQ_MRNA	11375	0.00134205	-2.91907
TSPO	NM_175776	REFSEQ_MRNA	23416	0.00023235	-2.91845
ACMSD	NM_001075694	REFSEQ_MRNA	18770	0.00034982	-2.91814
AP1G2	NM_001109808	REFSEQ_MRNA	18848	0.00051966	-2.91726
IQSEC2	XM_002700128	REFSEQ_MRNA_PREDICTED	11478	0.00146782	-2.88958
MGC142811	NM_001076951	REFSEQ_MRNA	27693	0.0006452	-2.88875
FADS3	NM_001083691	REFSEQ_MRNA	19297	0.00197182	-2.88709
DHX40	NM_001076897	REFSEQ_MRNA	29928	0.0048782	-2.87261
FAM36A	NM_001040585	REFSEQ_MRNA	11248	0.00784294	-2.86984
TNNI3K	NM_001078008	REFSEQ_MRNA	21622	0.00211703	-2.86928
C18H16ORF87	NM_001078045	REFSEQ_MRNA	37099	0.00206672	-2.86832
MGC127919	NM_001077007	REFSEQ_MRNA	38058	0.00048957	-2.85609
SCAND1	NM_001079591	REFSEQ_MRNA	6728	5.439e-05	-2.83903
ENOSF1	NM_001046550	REFSEQ_MRNA	19503	0.00205001	-2.83205
FERMT2	NM_001101264	REFSEQ_MRNA	14337	0.000205	-2.8316
VKORC1	NM_001003903	REFSEQ_MRNA	28661	0.00013903	-2.81443
NXT1	NM_001075805	REFSEQ_MRNA	39335	0.00187405	-2.81411
CHCHD5	NM_001037601	REFSEQ_MRNA	16023	0.00063933	-2.81207
MTF2	NM_001046556	REFSEQ_MRNA	21973	0.00863587	-2.79434
MPV17L2	NM_001098145	REFSEQ_MRNA	42791	0.00165982	-2.79344
SZRD1	NM_001114608	REFSEQ_MRNA	44426	0.00198091	-2.79072
SYPL1	NM_001110088	REFSEQ_MRNA	34104	0.00091133	-2.78488
SF3B5	NM_001025350	REFSEQ_MRNA	41388	0.00142481	-2.78446
SET	NM_001038564	REFSEQ_MRNA	16538	0.00062461	-2.77831
MRPS17	NM_001024500	REFSEQ_MRNA	44901	0.00011152	-2.76884
TEKT2	NM_001038103	REFSEQ_MRNA	1068	0.00104069	-2.76199
ELOF1	NM_001105508	REFSEQ_MRNA	29735	0.00011974	-2.7564
DEGS2	NM_001076251	REFSEQ_MRNA	40745	0.00092253	-2.75567
CWF19L2	BC141983	EMBL	13047	0.00010907	-2.74455
SECISBP2	XM_002689859	REFSEQ_MRNA_PREDICTED	36458	0.00534331	-2.7314
TOB2	NM_001083387	REFSEQ_MRNA	15148	0.00278333	-2.72486
TGS1	BC118468	EMBL	37220	0.00044539	-2.71952
NUDT16	NM_001075560	REFSEQ_MRNA	33161	0.00115537	-2.71449
SPEN	XM_591419	REFSEQ_MRNA_PREDICTED	23833	0.00915958	-2.70501
H3F3A	NM_001014389	REFSEQ_MRNA	40719	0.00361373	-2.70117
H2B	NM_001099384	REFSEQ_MRNA	2641	0.00297127	-2.69834
POLR2F	NM_001037475	REFSEQ_MRNA	25255	0.00025178	-2.69748
COMMD4	BT020811	EMBL	39933	0.00032267	-2.68997
ASF1A	NM_001076493	REFSEQ_MRNA	22094	0.00140561	-2.68467
ELAVL1	NM_001076454	REFSEQ_MRNA	43214	0.00167504	-2.68156
LMO1	NM_001075895	REFSEQ_MRNA	18854	0.00061008	-2.68033
GSTP1	NM_177516	REFSEQ_MRNA	40911	0.00959186	-2.67682
TELOMERASE-VERT	NR_001576	REFSEQ_NCRNA	36382	0.00705319	-2.66437
NDUFB10	NM_175818	REFSEQ_MRNA	31706	0.00017484	-2.65559
ASMTL	NM_001035058	REFSEQ_MRNA	44776	0.00320156	-2.6326
PTMA	NM_001039953	REFSEQ_MRNA	9032	0.00329093	-2.62515
PTPLA	XM_866930	REFSEQ_MRNA_PREDICTED	10360	0.00082432	-2.61667
DEFB123	NM_001102343	REFSEQ_MRNA	20971	0.0003457	-2.61038
PARD6A	NM_001046274	REFSEQ_MRNA	26839	0.00138674	-2.60554
APLP2	XM_001251234	REFSEQ_MRNA_PREDICTED	33717	0.00400515	-2.59896
TEAD1	XM_616694	REFSEQ_MRNA_PREDICTED	17176	0.00257017	-2.58961
EBD	NM_175703	REFSEQ_MRNA	14458	0.00705855	-2.58953
EIF2AK2	NM_178109	REFSEQ_MRNA	5957	0.00562419	-2.58825
ZCRB1	NM_001025318	REFSEQ_MRNA	33803	0.0005272	-2.57816
GRAP	NM_001102173	REFSEQ_MRNA	24242	0.00131309	-2.56269
TOMM6	NM_001113718	REFSEQ_MRNA	43408	0.00617783	-2.56239
FADD	NM_001007816	REFSEQ_MRNA	19225	0.00084214	-2.56224
HDDC2	NM_001075401	REFSEQ_MRNA	17267	0.00189582	-2.55993
IFI27	NM_001038050	REFSEQ_MRNA	8145	0.00300227	-2.55691
OPN1LW	NM_174566	REFSEQ_MRNA	12387	0.00578584	-2.54156
RPL37	NM_001078132	REFSEQ_MRNA	36702	0.00202418	-2.53487
PPAPDC2	NM_001024573	REFSEQ_MRNA	34146	0.00319777	-2.52428
U2SURP	XM_002685036	REFSEQ_MRNA_PREDICTED	4622	0.00264388	-2.52357
C3	NM_001040469	REFSEQ_MRNA	42361	0.00256822	-2.52272
ATP6V0E1	NM_001034050	REFSEQ_MRNA	41110	0.00026539	-2.52188
LLRC8A	NM_001076807	REFSEQ_MRNA	18045	0.00196751	-2.50619
C8H9ORF85	NM_001101235	REFSEQ_MRNA	41918	0.00425295	-2.50438
OGFOD2	XM_586925	REFSEQ_MRNA_PREDICTED	10200	0.00139537	-2.50437
HNRNPU	NM_001076920	REFSEQ_MRNA	28506	0.00088394	-2.49835
RPS26	NM_001015561	REFSEQ_MRNA	13761	0.00330936	-2.49756
TSPAN6	NM_001038109	REFSEQ_MRNA	10204	0.00332158	-2.48985
COMMD6	NM_001113312	REFSEQ_MRNA	19143	0.00420133	-2.48251
LMF2	NM_001037455	REFSEQ_MRNA	28830	0.00824963	-2.48171
ZFP90	XM_001788172	REFSEQ_MRNA_PREDICTED	43738	0.00797515	-2.4794
GALT	NM_001035041	REFSEQ_MRNA	29597	0.00030448	-2.47381
PSENEN	NM_001008669	REFSEQ_MRNA	36401	0.00054947	-2.45586
TMEM134	NM_001080254	REFSEQ_MRNA	38493	0.00071041	-2.45454
FNTB	NM_175805	REFSEQ_MRNA	37703	0.00388528	-2.43408
LTC4S	NM_001046098	REFSEQ_MRNA	9292	0.00040282	-2.42285
MMD2	NM_001075870	REFSEQ_MRNA	4638	0.0022152	-2.42063
DDX28	NM_001105422	REFSEQ_MRNA	32450	0.00024772	-2.41757
EPB49	NM_001034431	REFSEQ_MRNA	34978	0.00734045	-2.41206
CBX1	AY962097	EMBL	18122	0.00881735	-2.40787
ANKRD54	NM_001076137	REFSEQ_MRNA	38569	0.00605252	-2.4051
RNF149	XM_582694	REFSEQ_MRNA_PREDICTED	41534	0.00400192	-2.40138
SOAT1	NM_001034206	REFSEQ_MRNA	40156	0.00274628	-2.39451
SNRPG	NM_001040543	REFSEQ_MRNA	41885	0.00572327	-2.39212
OSBPL9	NM_001075505	REFSEQ_MRNA	21522	0.00026478	-2.39132
TM7SF3	NM_001076827	REFSEQ_MRNA	40415	0.00816152	-2.391
TSPAN17	NM_001014880	REFSEQ_MRNA	24101	0.00341232	-2.38989
WDR74	NM_001014854	REFSEQ_MRNA	28006	0.00040473	-2.38737
RPS16	NM_001033624	REFSEQ_MRNA	37503	0.00823332	-2.38379
RHOJ	NM_001083498	REFSEQ_MRNA	6428	0.00208645	-2.38061
SLC25A24	NM_001099066	REFSEQ_MRNA	28118	0.00223666	-2.37531
TTYH1	NM_001077015	REFSEQ_MRNA	38861	0.00036225	-2.37349
TEX2	NM_001101970	REFSEQ_MRNA	4232	0.003636	-2.36195
MRPS26	NM_001034514	REFSEQ_MRNA	23987	0.00700591	-2.36052
C4H7ORF11	NM_001075389	REFSEQ_MRNA	11301	0.00884298	-2.35959
PPP2CB	NM_001075857	REFSEQ_MRNA	30772	0.00224139	-2.34298
C1H21ORF2	NM_001075781	REFSEQ_MRNA	15967	0.00132286	-2.33653
NMNAT2	NM_001075486	REFSEQ_MRNA	39971	0.00076402	-2.33447
ELAC1	NM_001046327	REFSEQ_MRNA	37536	0.00446713	-2.33266
CUTA	NM_001075379	REFSEQ_MRNA	42299	0.00819605	-2.33212
SNCG	NM_174186	REFSEQ_MRNA	39000	0.00519553	-2.3243
GRWD1	NM_001076239	REFSEQ_MRNA	31483	0.00523417	-2.32132
RPL36A	NM_001034316	REFSEQ_MRNA	37027	0.00205015	-2.32045
TMEM128	NM_001034454	REFSEQ_MRNA	23294	0.00401022	-2.31395
CADM2	XM_002684658	REFSEQ_MRNA_PREDICTED	22058	0.0038534	-2.31163
ZNF786	XM_002687138	REFSEQ_MRNA_PREDICTED	25997	0.00389059	-2.30566
RPS11	NM_001024568	REFSEQ_MRNA	26962	0.00634231	-2.30563
PDE4A	NM_001101081	REFSEQ_MRNA	18814	0.00363517	-2.30456
TTF1	NM_001102083	REFSEQ_MRNA	2659	0.00198533	-2.30152
REEP2	NM_001046325	REFSEQ_MRNA	26500	0.00600144	-2.29713
CCDC22	NM_001076016	REFSEQ_MRNA	27563	0.00070056	-2.29561
AMN1	NM_001075858	REFSEQ_MRNA	26334	0.00341341	-2.29061
MGC157408	NM_001105381	REFSEQ_MRNA	30551	0.00712625	-2.28913
PELP1	XM_002695777	REFSEQ_MRNA_PREDICTED	15465	0.00141933	-2.28882
FAAP24	NM_001046062	REFSEQ_MRNA	32054	0.0005203	-2.27974
MRPL52	NM_001110180	REFSEQ_MRNA	28812	0.00258161	-2.27819
MMTAG2	NM_001034272	REFSEQ_MRNA	15533	0.00050878	-2.27009
BDH2	NM_001034488	REFSEQ_MRNA	44223	0.00215658	-2.26881
NFAT5	XM_002694839	REFSEQ_MRNA_PREDICTED	33777	0.00609509	-2.26778
LSM10	NM_001083781	REFSEQ_MRNA	42217	0.0036631	-2.26442
FBXW9	NM_001038151	REFSEQ_MRNA	22284	0.00150338	-2.25964
C10H14ORF166	NM_001035280	REFSEQ_MRNA	38596	0.00068577	-2.25867
RPL35A	NM_001025321	REFSEQ_MRNA	42637	0.00887271	-2.25397
RAB27A	NM_001101270	REFSEQ_MRNA	9961	0.0026899	-2.25205
NAT14	NM_001037245	REFSEQ_MRNA	10912	0.00164141	-2.24978
FBXO32	NM_001046155	REFSEQ_MRNA	18040	0.00413022	-2.24404
DNAJC16	NM_001101091	REFSEQ_MRNA	3635	0.00137893	-2.24309
WASL	NM_174219	REFSEQ_MRNA	18463	0.00286044	-2.24228
SPEG	NM_001142485	REFSEQ_MRNA	23941	0.00375188	-2.24173
C7H5ORF30	NM_001076128	REFSEQ_MRNA	20259	0.00775374	-2.2415
CPNE6	NM_001045990	REFSEQ_MRNA	29312	0.00223926	-2.2368
ADAMTS5	NM_001166515	REFSEQ_MRNA	24739	0.00807285	-2.23513
TBC1D7	NM_001015643	REFSEQ_MRNA	31711	0.00338383	-2.22852
CYHR1	NM_001015532	REFSEQ_MRNA	33069	0.00020477	-2.227
ISOC2	NM_001038123	REFSEQ_MRNA	19395	0.00521019	-2.22457
NUDT22	NM_001038680	REFSEQ_MRNA	44173	0.00741182	-2.22389
GTF3A	NM_001113572	REFSEQ_MRNA	13104	0.00107879	-2.2224
C22H3ORF18	NM_001101260	REFSEQ_MRNA	30794	0.00182115	-2.21865
RPL37A	NM_001035008	REFSEQ_MRNA	41713	0.00145322	-2.21682
SIAE	NM_001045968	REFSEQ_MRNA	28673	0.00089436	-2.2164
MTDH	NM_001046038	REFSEQ_MRNA	975	0.00030272	-2.21485
TNFRSF19	NM_001077096	REFSEQ_MRNA	37276	0.00822109	-2.21299
GABARAP	NM_001034048	REFSEQ_MRNA	35366	0.00386057	-2.21117
UBE2E3	NM_001079783	REFSEQ_MRNA	26743	0.00347774	-2.21057
NPFF	NM_174123	REFSEQ_MRNA	25776	0.0018832	-2.21023
TRMT10C	NM_001046323	REFSEQ_MRNA	14625	0.00186087	-2.20641
TBC1D1	NM_001166524	REFSEQ_MRNA	32160	0.00784536	-2.20517
COMTD1	NM_001105368	REFSEQ_MRNA	4396	0.00360874	-2.20412
AAMDC	NM_001037473	REFSEQ_MRNA	14742	0.0007464	-2.19913
DUT	NM_001077873	REFSEQ_MRNA	38124	0.00163356	-2.1984
NARFL	NM_001083411	REFSEQ_MRNA	21997	0.00642751	-2.19008
ZNF784	NM_001099731	REFSEQ_MRNA	36101	0.00120824	-2.18497
TMEM14C	NM_001035437	REFSEQ_MRNA	11005	0.00423583	-2.17769
MIA3	NM_001166571	REFSEQ_MRNA	26703	0.00359925	-2.17762
TMEM141	NM_001034462	REFSEQ_MRNA	23132	0.00388167	-2.1744
GCLM	NM_001038143	REFSEQ_MRNA	19100	0.00248249	-2.16995
INTB3	AJ297965	EMBL	25287	0.00627222	-2.16871
GNPTG	NM_001017428	REFSEQ_MRNA	11909	0.00164771	-2.16602
TMEM88	NM_001098378	REFSEQ_MRNA	3326	0.00653477	-2.16572
COX8B	NM_001114517	REFSEQ_MRNA	39305	0.0042864	-2.16505
SLC35E3	NM_001083654	REFSEQ_MRNA	6929	0.00480508	-2.1615
KANSL3	NM_001099172	REFSEQ_MRNA	41328	0.00478176	-2.15708
ANO6	XM_002687355	REFSEQ_MRNA_PREDICTED	32438	0.00264186	-2.15656
MFSD6L	NM_001102523	REFSEQ_MRNA	25730	0.00526074	-2.15644
B4GALT7	NM_001075321	REFSEQ_MRNA	16015	0.00240313	-2.15309
OVCA2	NM_001034601	REFSEQ_MRNA	38458	0.00644566	-2.15154
MBLAC1	NM_001075212	REFSEQ_MRNA	9374	0.001024	-2.15065
MRPL27	NM_001037453	REFSEQ_MRNA	30045	0.00963682	-2.1468
SEC22C	NM_001046546	REFSEQ_MRNA	43047	0.00407181	-2.14649
TRIM26	XM_001250767	REFSEQ_MRNA_PREDICTED	25455	0.00634811	-2.14584
TARBP2	NM_001075678	REFSEQ_MRNA	21558	0.0021458	-2.14577
LRP6	XM_002687783	REFSEQ_MRNA_PREDICTED	26122	0.00289955	-2.14547
CCDC43	NM_001098962	REFSEQ_MRNA	636	0.00078945	-2.13638
TFDP2	NM_001075241	REFSEQ_MRNA	24405	0.00527153	-2.13042
MED31	NM_001077989	REFSEQ_MRNA	16532	0.00738015	-2.12829
BLVRB	NM_174251	REFSEQ_MRNA	33080	0.0024419	-2.1235
CSNK1A1	NM_174711	REFSEQ_MRNA	41020	0.00243698	-2.12192
RALB	BC146173	EMBL	21119	0.00217826	-2.11771
RPS23	NM_001034690	REFSEQ_MRNA	36148	0.00890881	-2.11557
PTCD2	NM_001035298	REFSEQ_MRNA	43905	0.00694054	-2.11076
STK16	NM_001046255	REFSEQ_MRNA	40336	0.00325398	-2.1098
CLCN5	AJ810447	EMBL	15386	0.00165572	-2.10862
TMEM9B	NM_001034507	REFSEQ_MRNA	39663	0.00141866	-2.10754
ITPRIPL1	XM_587136	REFSEQ_MRNA_PREDICTED	26450	0.00196811	-2.10519
JOSD1	NM_001014898	REFSEQ_MRNA	38170	0.0027202	-2.10112
SMIM13	NM_001135578	REFSEQ_MRNA	23634	0.00843917	-2.09909
PROK2	NM_199445	REFSEQ_MRNA	23739	0.00323666	-2.09835
RAN	NM_001034705	REFSEQ_MRNA	27730	0.00184648	-2.09655
MYOM2	NM_001038140	REFSEQ_MRNA	44244	0.00776775	-2.09624
TDGF1	NM_001080358	REFSEQ_MRNA	22853	0.00511071	-2.08742
TBC1D22B	NM_001099148	REFSEQ_MRNA	42493	0.00341381	-2.08442
FAM69C	XM_595842	REFSEQ_MRNA_PREDICTED	3980	0.00094956	-2.08388
PLB1	XM_002691496	REFSEQ_MRNA_PREDICTED	37554	0.00061197	-2.08191
C2ORF76	NM_001037618	REFSEQ_MRNA	28173	0.00325679	-2.081
NEU1	NM_001083642	REFSEQ_MRNA	6803	0.00898738	-2.07145
TMEM234	NM_001105654	REFSEQ_MRNA	699	0.00391009	-2.07086
TRAPPC6A	NM_001034420	REFSEQ_MRNA	31114	0.00648908	-2.06769
MTMR14	NM_001100364	REFSEQ_MRNA	31276	0.00747724	-2.06674
CLTA	NM_174022	REFSEQ_MRNA	41883	0.00157407	-2.06299
MDP-1	NM_001037486	REFSEQ_MRNA	15634	0.00092038	-2.05989
TARM1	XM_002695517	REFSEQ_MRNA_PREDICTED	19569	0.00388596	-2.05941
LACTB	NM_001099133	REFSEQ_MRNA	30969	0.00560333	-2.05599
IL1B	NM_174093	REFSEQ_MRNA	17897	0.00151641	-2.05513
TCTEX1D2	NM_001166555	REFSEQ_MRNA	38891	0.00459799	-2.05029
ANKS1B	NM_001102291	REFSEQ_MRNA	22228	0.00797333	-2.04697
PREB	NM_001076875	REFSEQ_MRNA	40284	0.00127735	-2.04502
WASF2	NM_001081511	REFSEQ_MRNA	17525	0.00554943	-2.04297
RNASET2	BC122619	EMBL	37062	0.00525721	-2.03833
KDELR1	NM_001076495	REFSEQ_MRNA	6587	0.0016698	-2.03426
DMAP1	NM_001075346	REFSEQ_MRNA	7155	0.00196799	-2.03404
CDC26	NM_001078153	REFSEQ_MRNA	35108	0.00651344	-2.03299
ZNF8	NM_001098470	REFSEQ_MRNA	43903	0.00315505	-2.03187
KIAA0195	XM_864755	REFSEQ_MRNA_PREDICTED	15309	0.00278578	-2.03174
OR51G1	XM_001252702	REFSEQ_MRNA_PREDICTED	20573	0.00496538	-2.02825
GLRX2	NM_001040523	REFSEQ_MRNA	8944	0.00302859	-2.02808
ISL1	NM_001099130	REFSEQ_MRNA	26814	0.00521952	-2.02726
AK1	NM_001013582	REFSEQ_MRNA	21981	0.00345602	-2.02449
CATHL6	NM_174832	REFSEQ_MRNA	12432	0.00351499	-2.01687
TMEM47	NM_001076262	REFSEQ_MRNA	1404	0.00790473	-2.01361
GEMIN7	NM_001076489	REFSEQ_MRNA	5489	0.00570284	-2.01059
ADRB1	NM_194266	REFSEQ_MRNA	37598	0.0026668	-2.00911
COA3	NM_001034683	REFSEQ_MRNA	34417	0.00690823	-2.00778
LRFN3	NM_001076959	REFSEQ_MRNA	16396	0.00937554	-2.00629
A1BG	NM_001046243	REFSEQ_MRNA	12878	0.00106555	-2.00362
RNF121	NM_001102245	REFSEQ_MRNA	24988	0.00271828	-2.002
PIH1D1	NM_001075395	REFSEQ_MRNA	34872	0.00502391	-2.00186
WRN	NM_001143857	REFSEQ_MRNA	25950	0.0064696	-1.99755
CTNNBIP1	NM_001037142	REFSEQ_MRNA	42076	0.00653738	-1.98879
TNPO3	NM_001098090	REFSEQ_MRNA	18786	0.000855	-1.98805
ZMAT2	NM_001080343	REFSEQ_MRNA	19738	0.00380965	-1.98641
MPV17	NM_001045929	REFSEQ_MRNA	44855	0.00867016	-1.98625
THOC6	NM_001105503	REFSEQ_MRNA	28595	0.00644155	-1.98355
RPL24	NM_174455	REFSEQ_MRNA	20005	0.00583958	-1.9804
RAD23B	NM_001046310	REFSEQ_MRNA	7113	0.00177275	-1.97826
S100A12	NM_174651	REFSEQ_MRNA	6708	0.0022796	-1.97675
TNFAIP8L1	NM_001103270	REFSEQ_MRNA	26932	0.00409781	-1.96843
CIT	BC123442	EMBL	40927	0.00069736	-1.96763
PTGS1	NM_001105323	REFSEQ_MRNA	44506	0.00776702	-1.96567
TBC1D22A	NM_001076520	REFSEQ_MRNA	33085	0.00428846	-1.96335
SYPL2	NM_001075676	REFSEQ_MRNA	25035	0.00790664	-1.95843
ITSN1	XM_001249464	REFSEQ_MRNA_PREDICTED	44234	0.0095543	-1.95832
SYS1	NM_001046527	REFSEQ_MRNA	12376	0.00093264	-1.95771
IFNT	NM_001168275	REFSEQ_MRNA	25497	0.00637951	-1.95754
C4ORF22	NM_001076389	REFSEQ_MRNA	18067	0.00981333	-1.95689
B4GALNT2	XM_584835	REFSEQ_MRNA_PREDICTED	27505	0.00763452	-1.95602
USB1	NM_001075477	REFSEQ_MRNA	37207	0.00225538	-1.95511
RRNAD1	NM_001015641	REFSEQ_MRNA	23463	0.00515441	-1.95499
CCDC113	NM_001075910	REFSEQ_MRNA	26557	0.00336224	-1.95308
EPHA4	NM_001083441	REFSEQ_MRNA	21050	0.00748322	-1.94847
OR52B6	XM_870084	REFSEQ_MRNA_PREDICTED	24504	0.00625512	-1.94786
DTYMK	NM_001098893	REFSEQ_MRNA	5008	0.00724331	-1.94549
AGT	NM_001114082	REFSEQ_MRNA	28976	0.00958877	-1.94494
GLB1	NM_001035043	REFSEQ_MRNA	4023	0.00194171	-1.94091
EIF1AD	NM_001076393	REFSEQ_MRNA	41776	0.00906844	-1.93809
ANKRD26	NM_001113767	REFSEQ_MRNA	23602	0.00250451	-1.93262
LAMTOR4	NM_001166607	REFSEQ_MRNA	11191	0.00194446	-1.9282
AGTRAP	NM_001075363	REFSEQ_MRNA	39907	0.00307224	-1.92768
UBXN6	NM_001045986	REFSEQ_MRNA	24434	0.00382457	-1.92363
HOXA7	XM_002686855	REFSEQ_MRNA_PREDICTED	20893	0.00846937	-1.92061
CRYL1	NM_174293	REFSEQ_MRNA	19185	0.00990589	-1.91597
RALY	NM_001014847	REFSEQ_MRNA	27094	0.00815405	-1.91293
B9D2	NM_001040593	REFSEQ_MRNA	25998	0.00904703	-1.90952
CPLX2	NM_174283	REFSEQ_MRNA	45174	0.00349393	-1.9087
MAPK14	NM_001102174	REFSEQ_MRNA	20176	0.00274233	-1.90859
COMMD5	NM_001014850	REFSEQ_MRNA	6149	0.00187035	-1.90797
LEPROTL1	NM_001037462	REFSEQ_MRNA	18348	0.00600622	-1.90009
PARD3B	XM_002685530	REFSEQ_MRNA_PREDICTED	12921	0.00663221	-1.89854
PPIH	NM_001075618	REFSEQ_MRNA	39633	0.00419549	-1.89624
TMEM184A	NM_001046272	REFSEQ_MRNA	6472	0.0008024	-1.89136
IFITM2	NM_001078054	REFSEQ_MRNA	37569	0.00612427	-1.88742
DGCR6L	NM_001110446	REFSEQ_MRNA	23778	0.00231254	-1.88659
SIDT2	NM_001024530	REFSEQ_MRNA	7589	0.00470861	-1.88655
NAIF1	NM_001101074	REFSEQ_MRNA	22641	0.00209979	-1.88486
FBXO6	NM_001034433	REFSEQ_MRNA	6719	0.00308447	-1.8796
ANKRD61	NM_001077072	REFSEQ_MRNA	17709	0.00197469	-1.87923
LTB4R	NM_001034738	REFSEQ_MRNA	39504	0.00564105	-1.8792
TTLL2	NM_001075793	REFSEQ_MRNA	20490	0.00453344	-1.87615
POLR2I	NM_001076329	REFSEQ_MRNA	25587	0.00429216	-1.87563
APRT	NM_001025334	REFSEQ_MRNA	34165	0.00595698	-1.87495
MAPKAPK2	XM_002693890	REFSEQ_MRNA_PREDICTED	26820	0.00207521	-1.87221
GPC	NM_001002886	REFSEQ_MRNA	5398	0.00844729	-1.8722
GNB2	NM_001097561	REFSEQ_MRNA	15755	0.00678672	-1.87104
JMJD4	XM_582558	REFSEQ_MRNA_PREDICTED	33242	0.00433695	-1.87024
NOL12	NM_001046557	REFSEQ_MRNA	20216	0.0083953	-1.86956
C5H12ORF45	NM_001038689	REFSEQ_MRNA	29053	0.00524681	-1.86469
PFDN5	NM_174732	REFSEQ_MRNA	43907	0.00117558	-1.86261
HCST	NM_001076977	REFSEQ_MRNA	44328	0.00339448	-1.8619
TTI1	NM_001076042	REFSEQ_MRNA	22659	0.00632821	-1.86098
GNG7	NM_001113314	REFSEQ_MRNA	18889	0.00813918	-1.85511
CCL3	NM_174511	REFSEQ_MRNA	27218	0.00406012	-1.85483
C1ORF54	NM_001076346	REFSEQ_MRNA	3403	0.0022623	-1.85394
ZNF692	NM_001024496	REFSEQ_MRNA	39897	0.00175688	-1.85365
ARFRP1	NM_001037607	REFSEQ_MRNA	10899	0.0054825	-1.85062
DR1	NM_001046519	REFSEQ_MRNA	15413	0.00724333	-1.85056
ZC3H10	NM_001097993	REFSEQ_MRNA	30340	0.00655849	-1.84541
MYOZ1	NM_174397	REFSEQ_MRNA	8043	0.00740545	-1.8444
SLX1A	NM_001037456	REFSEQ_MRNA	30697	0.00529677	-1.8402
ACBD4	NM_001046214	REFSEQ_MRNA	12299	0.00376979	-1.83442
SPR	NM_001076003	REFSEQ_MRNA	45163	0.00118733	-1.83416
AMBP	NM_173989	REFSEQ_MRNA	43822	0.00656531	-1.8325
SYK	NM_001037465	REFSEQ_MRNA	44683	0.00503115	-1.82796
USP50	NM_001080230	REFSEQ_MRNA	45089	0.00956483	-1.81876
SLC10A4	NM_001078025	REFSEQ_MRNA	25594	0.00519289	-1.81828
DTNA	NM_001076260	REFSEQ_MRNA	16609	0.00192203	-1.81534
DBNDD2	NM_001130748	REFSEQ_MRNA	11210	0.00778925	-1.81531
GABRD	NM_001081715	REFSEQ_MRNA	33111	0.00200674	-1.81027
POLDIP3	NM_001103183	REFSEQ_MRNA	25266	0.00504904	-1.80976
DGCR14	NM_001100357	REFSEQ_MRNA	33273	0.00793887	-1.80898
C14H8ORF82	NM_001110184	REFSEQ_MRNA	14075	0.00507039	-1.80765
ACAA2	NM_001035342	REFSEQ_MRNA	21937	0.00901884	-1.8041
EXOSC5	XM_002694995	REFSEQ_MRNA_PREDICTED	33383	0.00792201	-1.80331
LENG1	NM_001034804	REFSEQ_MRNA	33636	0.00226533	-1.80197
MRS2	NM_001101903	REFSEQ_MRNA	17110	0.00194272	-1.80012
CHD7	XM_002692670	REFSEQ_MRNA_PREDICTED	13221	0.00763619	-1.80011
GTF2H4	NM_001101057	REFSEQ_MRNA	7886	0.00557838	-1.79722
OLFML2A	XM_594888	REFSEQ_MRNA_PREDICTED	22282	0.00985979	-1.79181
DIABLO	NM_001045882	REFSEQ_MRNA	30639	0.0064997	-1.78821
PRIM2	NM_001079594	REFSEQ_MRNA	15722	0.00633938	-1.78751
UPP1	NM_001098976	REFSEQ_MRNA	43938	0.00245342	-1.78691
DECR2	NM_001078122	REFSEQ_MRNA	41394	0.00348396	-1.78675
C25H7ORF26	NM_001075754	REFSEQ_MRNA	31243	0.00252903	-1.78569
FBXL8	NM_001076937	REFSEQ_MRNA	9802	0.00552816	-1.78284
SETD8	NM_001046330	REFSEQ_MRNA	42102	0.00600765	-1.78275
MRPL46	NM_001034712	REFSEQ_MRNA	37349	0.00225164	-1.7825
PIGL	NM_001100311	REFSEQ_MRNA	22943	0.00643565	-1.78114
SCAP	NM_001101889	REFSEQ_MRNA	32398	0.00778303	-1.77317
S100A8	NM_001113725	REFSEQ_MRNA	21827	0.00848391	-1.7701
CDCA7	NM_001037488	REFSEQ_MRNA	6124	0.00722541	-1.76369
LTBP2	NM_174385	REFSEQ_MRNA	3548	0.0053614	-1.7617
SMIM5	NM_001163000	REFSEQ_MRNA	29729	0.00457185	-1.76106
CD3EAP	NM_001076485	REFSEQ_MRNA	6677	0.00947875	-1.75812
GPR172B	NM_001075901	REFSEQ_MRNA	3010	0.00433649	-1.75594
MCOLN1	NM_001166132	REFSEQ_MRNA	4652	0.00359994	-1.7555
NECAP2	NM_001015562	REFSEQ_MRNA	1165	0.00971258	-1.75498
CRYBA1	NM_174523	REFSEQ_MRNA	28685	0.0095162	-1.75423
NQO2	NM_001034323	REFSEQ_MRNA	43960	0.00727552	-1.75373
PHOSPHO2	NM_001045965	REFSEQ_MRNA	26618	0.00325629	-1.75197
FUT2	NM_177500	REFSEQ_MRNA	44242	0.00853322	-1.7506
TRAM1L1	XM_581298	REFSEQ_MRNA_PREDICTED	21105	0.00783448	-1.74624
SYNGR2	NM_001100358	REFSEQ_MRNA	13567	0.00440924	-1.74576
PLEKHJ1	NM_001034569	REFSEQ_MRNA	28572	0.00436525	-1.74512
AMDHD2	NM_001101104	REFSEQ_MRNA	13078	0.00971292	-1.73962
ZFAND2B	NM_001098906	REFSEQ_MRNA	27967	0.00304245	-1.73848
AK3	NM_174237	REFSEQ_MRNA	23674	0.00790439	-1.73653
DNAJC5G	NM_001076429	REFSEQ_MRNA	18514	0.00588375	-1.73171
COMT	NM_001102317	REFSEQ_MRNA	42048	0.00804756	-1.73068
ACD	BC149587	EMBL	5892	0.00497435	-1.7284
ZBTB38	XM_589799	REFSEQ_MRNA_PREDICTED	19180	0.00303784	-1.72784
DUSP16	XM_870975	REFSEQ_MRNA_PREDICTED	34292	0.00767802	-1.72768
NUCKS1	NM_001045920	REFSEQ_MRNA	14900	0.00339076	-1.72494
MRPL3	NM_001080317	REFSEQ_MRNA	37847	0.00988579	-1.72229
MGC134093	NM_001077070	REFSEQ_MRNA	38703	0.00786816	-1.7203
CACNB3	NM_174509	REFSEQ_MRNA	32326	0.00958289	-1.71695
DOHH	NM_001075886	REFSEQ_MRNA	20684	0.00560094	-1.71565
NFKBIL1	NM_001015597	REFSEQ_MRNA	4425	0.00754996	-1.71268
ARPC1B	NM_001014844	REFSEQ_MRNA	27960	0.00909587	-1.71124
ANAPC11	NM_001113724	REFSEQ_MRNA	16768	0.0079279	-1.711
ST3GAL1	NM_001097983	REFSEQ_MRNA	13617	0.00430563	-1.71048
UFSP1	XM_606346	REFSEQ_MRNA_PREDICTED	39884	0.00636336	-1.70998
RECS1	NM_205798	REFSEQ_MRNA	42768	0.00994918	-1.70971
ARVCF	NM_001105380	REFSEQ_MRNA	26616	0.00702163	-1.70819
COX15	NM_001076861	REFSEQ_MRNA	18158	0.00838952	-1.70779
LCA5L	BC151815	EMBL	20592	0.00824288	-1.70682
HINT3	NM_174341	REFSEQ_MRNA	18733	0.00613632	-1.70662
VRK3	NM_001046251	REFSEQ_MRNA	17448	0.00708996	-1.70565
CDK2	NM_001014934	REFSEQ_MRNA	40447	0.00777817	-1.70443
PI3	NM_001080353	REFSEQ_MRNA	26075	0.0075301	-1.70308
G6PC	NM_001076124	REFSEQ_MRNA	38234	0.00558507	-1.69622
TPGS1	XM_582010	REFSEQ_MRNA_PREDICTED	25815	0.00628678	-1.69284
RPL39	BC151476	EMBL	23511	0.009837	-1.68756
H2AFX	NM_001079780	REFSEQ_MRNA	28007	0.00932847	-1.68518
PAAF1	NM_001075990	REFSEQ_MRNA	19020	0.00379881	-1.68494
BET1L	NM_001034362	REFSEQ_MRNA	27657	0.00411156	-1.6845
SRRM2	BC151743	EMBL	26249	0.0088925	-1.68205
INHBA	NM_174363	REFSEQ_MRNA	26168	0.00947003	-1.67881
KATNB1	NM_001101909	REFSEQ_MRNA	40202	0.0088193	-1.66436
PRND	NM_174158	REFSEQ_MRNA	16123	0.00908018	-1.63902
AGBL5	NM_001024564	REFSEQ_MRNA	11021	0.00840837	-1.63464
MARCH2	NM_001076380	REFSEQ_MRNA	10898	0.0095296	-1.63341
ITPA	NM_001076282	REFSEQ_MRNA	18153	0.00804352	-1.6223
MEST	NM_001083368	REFSEQ_MRNA	44277	0.00958127	-1.62187
RECQL4	NM_001098037	REFSEQ_MRNA	38324	0.00861106	-1.61202
PTPN11	XM_002694590	REFSEQ_MRNA_PREDICTED	42092	0.00933438	-1.58041
SOBP	NM_001101170	REFSEQ_MRNA	19627	0.00660844	-1.57603
GNG10	NM_001114512	REFSEQ_MRNA	19054	0.00845382	1.57151
THOC7	NM_001040514	REFSEQ_MRNA	40608	0.00908599	1.5717
ATP6V1B2	NM_176671	REFSEQ_MRNA	26635	0.0059478	1.58516
STX18	NM_001099719	REFSEQ_MRNA	37995	0.00768987	1.58518
GPM6B	NM_001104981	REFSEQ_MRNA	15247	0.00925163	1.58678
ZNF423	NM_001101893	REFSEQ_MRNA	45	0.00624578	1.58886
PPP2R5A	NM_001081728	REFSEQ_MRNA	5974	0.00592717	1.59735
RNF220	NM_001076941	REFSEQ_MRNA	27337	0.00987507	1.60265
GNG4	NM_001103324	REFSEQ_MRNA	4290	0.00848334	1.60574
CDC42SE2	NM_001102537	REFSEQ_MRNA	18944	0.00949331	1.60966
HABP4	NM_001081523	REFSEQ_MRNA	4800	0.00911664	1.61053
MLH1	NM_001075994	REFSEQ_MRNA	41502	0.00941034	1.61334
PAICS	NM_205813	REFSEQ_MRNA	1722	0.00946366	1.61397
KDM4C	XM_615781	REFSEQ_MRNA_PREDICTED	1451	0.00908128	1.61736
PLVAP	NM_001035353	REFSEQ_MRNA	11747	0.00496746	1.62521
WDYHV1	NM_001035091	REFSEQ_MRNA	5575	0.0071686	1.62565
SVOP	NM_001075441	REFSEQ_MRNA	4865	0.00942876	1.63556
ACTR10	NM_001034400	REFSEQ_MRNA	37641	0.00511167	1.64585
EIF4A3	NM_001046188	REFSEQ_MRNA	1518	0.00956162	1.65372
SLC15A4	NM_001101927	REFSEQ_MRNA	21078	0.00697485	1.65595
NRBF2	NM_001078131	REFSEQ_MRNA	15159	0.00547114	1.66027
PTGES3	NM_001007806	REFSEQ_MRNA	33005	0.00787629	1.66181
TRAT1	NM_001163943	REFSEQ_MRNA	3567	0.00613188	1.6698
IL16	NM_001075253	REFSEQ_MRNA	2164	0.00876257	1.671
KIAA0907	NM_001083456	REFSEQ_MRNA	2777	0.00483489	1.67193
XPNPEP1	NM_001075602	REFSEQ_MRNA	17291	0.00544032	1.67431
CLSTN3	NM_001075425	REFSEQ_MRNA	34486	0.00466404	1.67568
PPT2	NM_001035318	REFSEQ_MRNA	6816	0.00952459	1.67634
ZZZ3	NM_001102215	REFSEQ_MRNA	8588	0.00849058	1.67944
DCTD	NM_001101292	REFSEQ_MRNA	15964	0.00414712	1.68172
PIAS4	NM_001083482	REFSEQ_MRNA	1032	0.00674282	1.6835
PRRT1	NM_001076947	REFSEQ_MRNA	13914	0.00520439	1.68489
ATG4B	NM_001001170	REFSEQ_MRNA	14898	0.00728021	1.68976
DIO1	NM_001122593	REFSEQ_MRNA	1665	0.00825254	1.69442
ARHGAP21	XM_581232	REFSEQ_MRNA_PREDICTED	13132	0.00720683	1.69655
SEC24D	XM_580541	REFSEQ_MRNA_PREDICTED	12279	0.0093547	1.69968
GPC3	NM_001035463	REFSEQ_MRNA	42807	0.00875569	1.70228
PABPN1	NM_174569	REFSEQ_MRNA	21730	0.00424914	1.70317
GPS1	NM_001102094	REFSEQ_MRNA	13712	0.00376024	1.70464
SAPS3	NM_001105372	REFSEQ_MRNA	13857	0.00357761	1.70543
PISD	NM_001024475	REFSEQ_MRNA	26351	0.00921315	1.70683
NPL	NM_001045978	REFSEQ_MRNA	11553	0.0071317	1.7153
PRP	NM_181015	REFSEQ_MRNA	6083	0.00679665	1.71601
FBXO31	XM_591717	REFSEQ_MRNA_PREDICTED	2110	0.00703995	1.71837
AES	NM_001128497	REFSEQ_MRNA	19552	0.00567535	1.72109
PRUNE	NM_001035352	REFSEQ_MRNA	35570	0.0098822	1.72157
IMMT	NM_001046015	REFSEQ_MRNA	12186	0.00566272	1.72819
EIF2B5	XM_001251995	REFSEQ_MRNA_PREDICTED	20564	0.00799409	1.73152
TMEM199	NM_001075512	REFSEQ_MRNA	8293	0.00634907	1.73302
CSE1L	NM_001014933	REFSEQ_MRNA	23000	0.00451975	1.73948
RIOK3	NM_001075836	REFSEQ_MRNA	6288	0.00936219	1.7398
HEATR3	NM_001078021	REFSEQ_MRNA	22372	0.00964646	1.74048
CCDC126	NM_001082472	REFSEQ_MRNA	17592	0.00392872	1.74117
PITRM1	XM_590885	REFSEQ_MRNA_PREDICTED	17551	0.00274976	1.74722
HSD11B1	NM_001123032	REFSEQ_MRNA	8699	0.00943887	1.74782
GTF2E2	NM_001046065	REFSEQ_MRNA	44724	0.00689745	1.75044
PARS2	XM_002686377	REFSEQ_MRNA_PREDICTED	2386	0.00797415	1.75287
ATP6V1C1	NM_176676	REFSEQ_MRNA	29069	0.00661217	1.75292
C20ORF18	NM_001075161	REFSEQ_MRNA	4266	0.00810212	1.75769
ZDHHC7	XM_002694749	REFSEQ_MRNA_PREDICTED	6689	0.00314309	1.76079
AZIN1	NM_001082611	REFSEQ_MRNA	28525	0.00253808	1.76084
NAT10	NM_001098031	REFSEQ_MRNA	16731	0.0095523	1.76146
TOMM22	NM_001100335	REFSEQ_MRNA	9009	0.00958495	1.76444
DHRS1	NM_001046294	REFSEQ_MRNA	4132	0.00926112	1.76459
SEPT3	NM_001076949	REFSEQ_MRNA	10275	0.00767466	1.76834
AP3B1	NM_001076534	REFSEQ_MRNA	17931	0.00359731	1.77052
UFL1	NM_001080276	REFSEQ_MRNA	29771	0.00842071	1.77147
CHRAC1	NM_001075478	REFSEQ_MRNA	13947	0.00797142	1.77187
ZNF407	XM_002697658	REFSEQ_MRNA_PREDICTED	9874	0.00652351	1.77373
HERC3	NM_001083663	REFSEQ_MRNA	30888	0.00442485	1.77388
SMC5	XM_585794	REFSEQ_MRNA_PREDICTED	4479	0.00977441	1.7748
BNC1	XM_002696597	REFSEQ_MRNA_PREDICTED	445	0.00997225	1.77573
CCDC42B	NM_001144873	REFSEQ_MRNA	5353	0.00705589	1.77809
RHBDL2	NM_001102014	REFSEQ_MRNA	24557	0.0050364	1.78107
SRSF6	NM_001035272	REFSEQ_MRNA	4067	0.00321953	1.78152
PSME4	BC133424	EMBL	10978	0.00519833	1.78258
KXD1	NM_001034605	REFSEQ_MRNA	1418	0.00445915	1.78288
PARK7	NM_001015572	REFSEQ_MRNA	21591	0.00434419	1.78543
CUL4A	XM_870269	REFSEQ_MRNA_PREDICTED	29902	0.00195592	1.78873
VPS4A	NM_001046615	REFSEQ_MRNA	19817	0.00563043	1.79389
SPAG7	NM_001038543	REFSEQ_MRNA	42965	0.00363492	1.79494
FASTK	NM_001035077	REFSEQ_MRNA	31086	0.00284222	1.79514
C1ORF131	XM_592048	REFSEQ_MRNA_PREDICTED	17425	0.00997566	1.79603
KBTBD2	NM_001102013	REFSEQ_MRNA	10562	0.00673793	1.79686
LRRC8D	NM_001083741	REFSEQ_MRNA	20530	0.00692493	1.79921
UTP6	NM_001099140	REFSEQ_MRNA	30026	0.00279575	1.79927
NHLRC2	NM_001083723	REFSEQ_MRNA	29325	0.003718	1.80115
MROH1	NM_001102018	REFSEQ_MRNA	27766	0.007674	1.80234
FAM48A	NM_001046370	REFSEQ_MRNA	8955	0.00688831	1.80599
NGDN	NM_001046459	REFSEQ_MRNA	33547	0.00847299	1.80737
PEX14	NM_001080237	REFSEQ_MRNA	3932	0.00519342	1.80803
PELI1	NM_001078004	REFSEQ_MRNA	20643	0.00638817	1.80975
PPP3R1	NM_174583	REFSEQ_MRNA	33287	0.00531784	1.81352
NPTN	NM_001076199	REFSEQ_MRNA	43397	0.00722036	1.81509
OAS2	NM_001024557	REFSEQ_MRNA	1389	0.00539731	1.81629
DHX32	NM_001101144	REFSEQ_MRNA	12680	0.00334204	1.81846
MAPRE3	NM_001075917	REFSEQ_MRNA	37631	0.009781	1.82145
SH3BGRL	NM_001035440	REFSEQ_MRNA	14927	0.00589636	1.82215
MEA1	BC102492	EMBL	33042	0.00782306	1.82396
PRKACA	NM_174584	REFSEQ_MRNA	23042	0.00837311	1.82482
LURAP1L	NM_001101256	REFSEQ_MRNA	22377	0.00710964	1.82606
MRPL49	NM_001014871	REFSEQ_MRNA	755	0.002971	1.83336
H2AFY	NM_001046340	REFSEQ_MRNA	39213	0.00498088	1.83557
EIF2A	NM_001102283	REFSEQ_MRNA	31863	0.002611	1.8391
VPS18	NM_001100380	REFSEQ_MRNA	6252	0.00200946	1.84033
PSMC5	NM_174441	REFSEQ_MRNA	21264	0.00538943	1.84097
C5AR1	NM_001007810	REFSEQ_MRNA	15788	0.00432147	1.84616
IGJ	NM_175773	REFSEQ_MRNA	26093	0.00502297	1.84666
DPY30	NM_001077916	REFSEQ_MRNA	927	0.00259047	1.84809
ITGA4	NM_174748	REFSEQ_MRNA	13799	0.00600526	1.85119
USP8	NM_001076126	REFSEQ_MRNA	31496	0.00404454	1.85494
ZBTB18	NM_001078016	REFSEQ_MRNA	18746	0.00416111	1.85656
MKRN1	NM_001104979	REFSEQ_MRNA	14152	0.00478014	1.85783
ANKRD49	NM_001014965	REFSEQ_MRNA	2880	0.00389105	1.85937
AKIP1	NM_001034203	REFSEQ_MRNA	1716	0.00181593	1.8618
GAPVD1	NM_001102520	REFSEQ_MRNA	26981	0.0027068	1.86316
SF3B3	NM_001077851	REFSEQ_MRNA	25859	0.00733461	1.86476
DDX1	NM_001075468	REFSEQ_MRNA	14377	0.00210284	1.86595
HNRNPAB	NM_001040522	REFSEQ_MRNA	4510	0.00511502	1.86754
ATAD1	BC151346	EMBL	31607	0.00560631	1.86919
LAT	NM_001104978	REFSEQ_MRNA	20436	0.00540479	1.87202
TMBIM6	NM_001076414	REFSEQ_MRNA	34762	0.00441823	1.87223
POR	NM_001035390	REFSEQ_MRNA	19330	0.00257107	1.87506
PDE12	NM_001076133	REFSEQ_MRNA	11419	0.00407064	1.87569
TMEM34	NM_001075180	REFSEQ_MRNA	34399	0.00303382	1.87682
HIAT1	NM_001102038	REFSEQ_MRNA	17073	0.00403913	1.87759
TCEAL8	NM_001077116	REFSEQ_MRNA	10944	0.00807999	1.8787
GTF2I	NM_001102177	REFSEQ_MRNA	33107	0.0022868	1.88055
TXNDC12	NM_001015536	REFSEQ_MRNA	16296	0.00426186	1.88071
CEP104	XM_002694118	REFSEQ_MRNA_PREDICTED	10478	0.00490008	1.88403
CAND1	NM_001101173	REFSEQ_MRNA	34454	0.00330733	1.88542
HIATL1	NM_001083662	REFSEQ_MRNA	11284	0.00295267	1.88557
TRAPPC6B	NM_001038134	REFSEQ_MRNA	10575	0.00905774	1.88661
ERP70	NM_001045879	REFSEQ_MRNA	16611	0.00305037	1.88964
BBX	BC118439	EMBL	26043	0.00298585	1.89415
AP1S1	NM_001077110	REFSEQ_MRNA	39820	0.00530061	1.89479
SCG3	NM_001102097	REFSEQ_MRNA	5177	0.00717247	1.89752
MCM10	XM_605989	REFSEQ_MRNA_PREDICTED	4323	0.00333339	1.89881
GATAD2A	NM_001103090	REFSEQ_MRNA	25578	0.00984645	1.90015
GNAL	NM_001102554	REFSEQ_MRNA	23538	0.0066189	1.90119
RBM14	NM_001014901	REFSEQ_MRNA	7590	0.00752474	1.90201
SUCLA2	NM_001075493	REFSEQ_MRNA	31795	0.00561646	1.9034
DRG1	NM_001034691	REFSEQ_MRNA	16935	0.00424781	1.90365
SMYD2	NM_001076364	REFSEQ_MRNA	3848	0.004868	1.90368
PCM1	XM_002698663	REFSEQ_MRNA_PREDICTED	5671	0.00652233	1.90708
TOR1A	NM_001099058	REFSEQ_MRNA	43000	0.00362165	1.9095
LNX2	NM_001075884	REFSEQ_MRNA	9940	0.0078024	1.90963
FBXO18	NM_001099063	REFSEQ_MRNA	4929	0.00540496	1.91062
C22H3ORF10	NM_001114510	REFSEQ_MRNA	4138	0.00258545	1.91252
PDXDC1	NM_001101859	REFSEQ_MRNA	11803	0.00245447	1.91435
TRAF6	NM_001034661	REFSEQ_MRNA	43307	0.00997729	1.91444
RAP1GDS1	NM_174666	REFSEQ_MRNA	7686	0.00363087	1.91473
ALKBH3	NM_001037602	REFSEQ_MRNA	1423	0.00559697	1.91506
CASC4	NM_001081737	REFSEQ_MRNA	31189	0.00511972	1.91562
C1QBP	NM_001034527	REFSEQ_MRNA	8775	0.00389976	1.91981
HNRNPA2B1	NM_001045975	REFSEQ_MRNA	25482	0.00383852	1.92066
WASH1	NM_001105406	REFSEQ_MRNA	729	0.00511526	1.92123
RBBP7	NM_001034638	REFSEQ_MRNA	10677	0.00106497	1.92147
RNF166	NM_001099134	REFSEQ_MRNA	1839	0.00202995	1.92264
ZSCAN16	NM_001034411	REFSEQ_MRNA	5028	0.00794544	1.92451
POLD2	NM_174428	REFSEQ_MRNA	4465	0.00732148	1.92463
TTC3	NM_001109767	REFSEQ_MRNA	23960	0.00851766	1.92797
DLL4	NM_001075779	REFSEQ_MRNA	5315	0.00430281	1.92972
FAM122A	NM_001101196	REFSEQ_MRNA	11612	0.00939104	1.9331
ZNF207	NM_001035268	REFSEQ_MRNA	3672	0.00371022	1.9339
SLC7A3	NM_001078019	REFSEQ_MRNA	9345	0.00644749	1.93632
KIAA0020	NM_001098030	REFSEQ_MRNA	18419	0.0046944	1.93766
SMAD4	NM_001076209	REFSEQ_MRNA	3299	0.00680563	1.93866
FBL	AF491875	EMBL	5464	0.00174098	1.9411
CDC2L1	NM_001007811	REFSEQ_MRNA	42763	0.00293765	1.94264
KRT35	NM_001076073	REFSEQ_MRNA	1965	0.00678418	1.94295
TRMT10A	NM_001035477	REFSEQ_MRNA	4971	0.00638866	1.94368
ATP5B	NM_175796	REFSEQ_MRNA	4683	0.00264556	1.94384
DDX23	NM_001102202	REFSEQ_MRNA	25706	0.00428123	1.94604
CERS2	NM_001034667	REFSEQ_MRNA	1626	0.00281825	1.94702
SYF2	XM_002685769	REFSEQ_MRNA_PREDICTED	19915	0.00370094	1.94999
CCDC97	NM_001082603	REFSEQ_MRNA	1005	0.00322413	1.95011
PIBF1	XM_002691887	REFSEQ_MRNA_PREDICTED	34539	0.00199465	1.9539
PABPC4	NM_001083724	REFSEQ_MRNA	31020	0.00851984	1.95488
RNF11	NM_001077953	REFSEQ_MRNA	11960	0.00127479	1.95589
FBXO9	NM_001034412	REFSEQ_MRNA	29292	0.00417759	1.95885
SRSF2	NM_001034318	REFSEQ_MRNA	9840	0.0038398	1.95933
ZNF295	NM_001083659	REFSEQ_MRNA	3044	0.00263841	1.96137
CWC15	NM_001046399	REFSEQ_MRNA	33944	0.00957939	1.9622
TPCN1	XM_588037	REFSEQ_MRNA_PREDICTED	1754	0.00199529	1.96718
CBX3	NM_001101198	REFSEQ_MRNA	31247	0.00910285	1.96791
CRIPT	NM_001034803	REFSEQ_MRNA	38423	0.00911583	1.97146
BHLHE41	NM_001076297	REFSEQ_MRNA	34834	0.00522147	1.97196
EBAG9	NM_001078015	REFSEQ_MRNA	10452	0.00562705	1.97676
CS	NM_001044721	REFSEQ_MRNA	6617	0.00182951	1.97732
EIF3B	NM_001102356	REFSEQ_MRNA	4691	0.00322039	1.98275
PSMA6	NM_001045962	REFSEQ_MRNA	34662	0.00186573	1.98292
RNF10	NM_001076869	REFSEQ_MRNA	40365	0.00756645	1.98393
C4ORF3	XM_002688056	REFSEQ_MRNA_PREDICTED	18226	0.00148443	1.98585
PNRC2	NM_001076957	REFSEQ_MRNA	38147	0.00437071	1.98775
CNOT3	XM_605695	REFSEQ_MRNA_PREDICTED	13457	0.00886913	1.98826
BRWD2	NM_001101122	REFSEQ_MRNA	3535	0.00476301	1.98927
IGBP1	NM_001104988	REFSEQ_MRNA	23451	0.00830256	1.98974
TXNL1	NM_001077886	REFSEQ_MRNA	25214	0.00329009	1.99136
GNAQ	NM_001110002	REFSEQ_MRNA	2590	0.0008478	1.99223
MEAF6	NM_001024572	REFSEQ_MRNA	9168	0.00335845	1.99369
MED13	XM_002695603	REFSEQ_MRNA_PREDICTED	11599	0.00115542	1.99372
UBR7	NM_001082601	REFSEQ_MRNA	41638	0.00426508	1.9938
TRAPPC13	NM_001101940	REFSEQ_MRNA	1554	0.00338681	1.99682
ANAPC1	XM_615671	REFSEQ_MRNA_PREDICTED	15673	0.00534381	2
ORC3	NM_001038139	REFSEQ_MRNA	5560	0.0061598	2.00099
SFRS11	NM_001075621	REFSEQ_MRNA	12918	0.00502019	2.002
USP1	NM_001046224	REFSEQ_MRNA	5060	0.00743854	2.00612
RAF1	NM_001102505	REFSEQ_MRNA	16086	0.00223684	2.00664
AP3D1	NM_173998	REFSEQ_MRNA	25026	0.00194918	2.00689
DIEXF	NM_001105352	REFSEQ_MRNA	32943	0.00203281	2.00736
IRAK4	NM_001075998	REFSEQ_MRNA	6750	0.00083038	2.00816
EIF2B1	NM_001075743	REFSEQ_MRNA	33749	0.00627958	2.00908
ASCC2	NM_001015524	REFSEQ_MRNA	7394	0.00642385	2.01118
RBBP4	NM_001077013	REFSEQ_MRNA	15085	0.0037605	2.01289
CALM	BC123890	EMBL	21813	0.0034652	2.01319
C1GALT1C1	NM_001034575	REFSEQ_MRNA	25290	0.00578391	2.0133
GDI2	NM_001033762	REFSEQ_MRNA	9710	0.0054392	2.01332
C2ORF49	NM_001081539	REFSEQ_MRNA	8846	0.00836286	2.01563
PCDHGC3	NM_001102513	REFSEQ_MRNA	2790	0.00610702	2.0184
CCT8	NM_001033609	REFSEQ_MRNA	14430	0.00089247	2.01896
SKP1	NM_001034781	REFSEQ_MRNA	17163	0.00285678	2.02038
DBNL	NM_001098970	REFSEQ_MRNA	33652	0.00444142	2.02472
LYPLA1	NM_001034688	REFSEQ_MRNA	20378	0.0009735	2.02597
FAM118B	NM_001015677	REFSEQ_MRNA	14195	0.00283438	2.02817
SEPT10	NM_001046176	REFSEQ_MRNA	42106	0.00310191	2.0284
NXF1	NM_001075555	REFSEQ_MRNA	17755	0.00193163	2.02977
PSKH1	NM_001075413	REFSEQ_MRNA	8719	0.00332021	2.03133
SH3KBP1	NM_001128500	REFSEQ_MRNA	13245	0.00773611	2.03201
PIGS	NM_001034216	REFSEQ_MRNA	6406	0.00485001	2.03225
LRRC40	NM_001103262	REFSEQ_MRNA	35919	0.00776276	2.03301
ABHD1	NM_001035094	REFSEQ_MRNA	3374	0.00753928	2.03492
PRKAG1	NM_174586	REFSEQ_MRNA	11557	0.0037829	2.03749
ATN1	BC149148	EMBL	30901	0.00597818	2.03855
USP11	NM_001080308	REFSEQ_MRNA	3065	0.00729152	2.04149
PCBP1	NM_001015565	REFSEQ_MRNA	25919	0.00412824	2.04187
GORAB	NM_001167897	REFSEQ_MRNA	6487	0.00878435	2.04322
CNPY2	NM_001075267	REFSEQ_MRNA	2192	0.00245041	2.04363
GPD2	NM_001100296	REFSEQ_MRNA	9597	0.00527088	2.04617
MARS2	NM_001098971	REFSEQ_MRNA	30765	0.00297251	2.04694
SERINC1	NM_001035427	REFSEQ_MRNA	39146	0.00346592	2.04697
FECH	NM_174054	REFSEQ_MRNA	11886	0.00401763	2.05067
MYST2	NM_001076818	REFSEQ_MRNA	6511	0.00744145	2.05077
ERP44	NM_001035032	REFSEQ_MRNA	39923	0.00192438	2.05359
PEBP1	NM_001033623	REFSEQ_MRNA	1149	0.00656121	2.05419
MED20	NM_001103293	REFSEQ_MRNA	3125	0.00745271	2.05538
TOMM20	NM_001099183	REFSEQ_MRNA	40006	0.004361	2.05851
DEDD	NM_001034643	REFSEQ_MRNA	10770	0.00161782	2.06
EMC10	NM_001080239	REFSEQ_MRNA	31563	0.00149633	2.06045
FAM208B	XM_002692177	REFSEQ_MRNA_PREDICTED	23004	0.00316239	2.06226
SNRPD1	NM_001035065	REFSEQ_MRNA	32440	0.00440739	2.065
PNPLA8	XM_002686783	REFSEQ_MRNA_PREDICTED	18355	0.00180771	2.06514
MYCN	XM_869019	REFSEQ_MRNA_PREDICTED	41822	0.00810437	2.06784
PUS3	NM_001034512	REFSEQ_MRNA	12654	0.00173717	2.0702
MRPL9	NM_001035029	REFSEQ_MRNA	1406	0.00231752	2.07461
TPM1	NM_001013590	REFSEQ_MRNA	1377	0.00436224	2.07519
CANX	NM_001105612	REFSEQ_MRNA	17781	0.00485305	2.07837
ATF1	NM_001075289	REFSEQ_MRNA	22133	0.00377799	2.0794
ELF1	NM_001077853	REFSEQ_MRNA	13724	0.00087415	2.07987
NEDD8	NM_174764	REFSEQ_MRNA	6338	0.00678165	2.08086
RNF4	NM_001046589	REFSEQ_MRNA	18904	0.00283328	2.08167
OSER1	NM_001015568	REFSEQ_MRNA	17124	0.00682616	2.08362
NIP30	NM_001014944	REFSEQ_MRNA	9416	0.00210871	2.08579
GTDC1	NM_001076035	REFSEQ_MRNA	7809	0.0077741	2.08689
HNRNPK	NM_001034562	REFSEQ_MRNA	37383	0.00380351	2.08934
GGTA1	NM_177511	REFSEQ_MRNA	11432	0.00311765	2.09191
CCAR1	NM_001076532	REFSEQ_MRNA	8452	0.00706946	2.09217
C10H15ORF24	NM_001099143	REFSEQ_MRNA	24355	0.00765029	2.09352
TPD52L2	NM_001034615	REFSEQ_MRNA	528	0.00153104	2.0937
RNF13	NM_001076142	REFSEQ_MRNA	24916	0.00923163	2.09576
CYB5R3	NM_001103250	REFSEQ_MRNA	8560	0.00230134	2.09642
CACHD1	XM_616138	REFSEQ_MRNA_PREDICTED	36171	0.00498147	2.09727
AZI2	NM_001077005	REFSEQ_MRNA	2576	0.00123829	2.0981
TRNAU1AP	NM_001075967	REFSEQ_MRNA	34259	0.00135791	2.10233
F8	NM_001145508	REFSEQ_MRNA	12643	0.00743363	2.10373
NFIB	NM_001076104	REFSEQ_MRNA	20949	0.00669687	2.10631
HGSNAT	XM_588978	REFSEQ_MRNA_PREDICTED	11696	0.00565601	2.10643
UBE2D3	NM_001075135	REFSEQ_MRNA	14507	0.0008758	2.10746
EIF4A1	NM_001034228	REFSEQ_MRNA	33953	0.0044106	2.11513
ZSCAN20	XM_002686492	REFSEQ_MRNA_PREDICTED	1355	0.00558432	2.11912
SETD2	XM_002697109	REFSEQ_MRNA_PREDICTED	12967	0.00843944	2.12185
CARD10	XM_615197	REFSEQ_MRNA_PREDICTED	33439	0.00443443	2.12424
GLT8D1	NM_001015579	REFSEQ_MRNA	42899	0.0037741	2.12481
TAF11	NM_001034276	REFSEQ_MRNA	22063	0.00257371	2.12515
LUC7L3	NM_001034684	REFSEQ_MRNA	5305	0.00616003	2.12522
VPS54	NM_001105460	REFSEQ_MRNA	2970	0.00189695	2.12878
BRD2	NM_001045866	REFSEQ_MRNA	8042	0.0021566	2.1307
ELP2	NM_001143864	REFSEQ_MRNA	11146	0.00463017	2.1321
AFTPH	XM_001790625	REFSEQ_MRNA_PREDICTED	39377	0.00195893	2.13365
ARF4	NM_001034530	REFSEQ_MRNA	3915	0.00955823	2.13374
NUP85	NM_001034387	REFSEQ_MRNA	44280	0.00168438	2.13481
EZR	NM_174217	REFSEQ_MRNA	12190	0.0009202	2.13568
PGK1	NM_001034299	REFSEQ_MRNA	34734	0.00258597	2.13645
QRICH1	NM_001098015	REFSEQ_MRNA	39777	0.002251	2.13651
PNRC1	NM_001034308	REFSEQ_MRNA	32881	0.00270282	2.13885
SPRY1	NM_001099366	REFSEQ_MRNA	1664	0.00216367	2.13979
EIF4G2	NM_001099859	REFSEQ_MRNA	36327	0.00116566	2.14372
STIP1	NM_001035492	REFSEQ_MRNA	34785	0.00110966	2.14421
MBTPS1	NM_001025330	REFSEQ_MRNA	32428	0.00211817	2.14474
ZO2	AJ313184	EMBL	14619	0.00393128	2.14556
MAEA	NM_001034415	REFSEQ_MRNA	14277	0.00119175	2.14608
CSNK1D	NM_001102080	REFSEQ_MRNA	27147	0.00368755	2.14639
HUS1	NM_001079592	REFSEQ_MRNA	18411	0.00395497	2.14683
UTP11L	NM_001098092	REFSEQ_MRNA	5413	0.00690817	2.14825
MGC133692	NM_001038509	REFSEQ_MRNA	22260	0.00615891	2.14919
RNF167	NM_001076405	REFSEQ_MRNA	5444	0.00511582	2.15075
PRPF38A	NM_001075307	REFSEQ_MRNA	1306	0.00824274	2.15254
ATP1B3	NM_001035393	REFSEQ_MRNA	11457	0.0086206	2.15723
UBXN4	NM_001035414	REFSEQ_MRNA	21914	0.00074286	2.15869
SPARC	NM_174464	REFSEQ_MRNA	28824	0.00149467	2.15884
EIF3G	NM_001079623	REFSEQ_MRNA	13141	0.00170486	2.16452
HMGN1	NM_001034772	REFSEQ_MRNA	14953	0.00859111	2.1652
USO1	NM_174845	REFSEQ_MRNA	29775	0.00275665	2.16792
TEX9	NM_001099006	REFSEQ_MRNA	1155	0.00056557	2.16804
RRAGA	NM_001035499	REFSEQ_MRNA	29298	0.00105279	2.16973
SH3GL1	NM_001046130	REFSEQ_MRNA	17349	0.00146591	2.17092
ERGIC2	NM_001075563	REFSEQ_MRNA	5945	0.00081044	2.17689
MORF4L2	NM_001099084	REFSEQ_MRNA	41511	0.00187296	2.18172
USP7	XM_002697958	REFSEQ_MRNA_PREDICTED	25823	0.00135111	2.18306
NDUFV3	NM_175830	REFSEQ_MRNA	2683	0.00225365	2.18731
MARCH5	NM_001034715	REFSEQ_MRNA	26049	0.00556648	2.19188
ANO10	NM_001102169	REFSEQ_MRNA	24125	0.00654169	2.19205
LAMTOR3	NM_001075982	REFSEQ_MRNA	2802	0.00924735	2.1942
WAC	XM_611722	REFSEQ_MRNA_PREDICTED	30247	0.00863279	2.1973
STT3B	NM_001097570	REFSEQ_MRNA	40677	0.00813321	2.19932
M6PR	NM_175779	REFSEQ_MRNA	10133	0.0053773	2.20374
YBX1	NM_174815	REFSEQ_MRNA	42638	0.00121953	2.20951
ORC4	NM_001046301	REFSEQ_MRNA	14457	0.00548369	2.21266
MYBBP1A	XM_590665	REFSEQ_MRNA_PREDICTED	7581	0.00440846	2.21621
ARPC1A	NM_001075359	REFSEQ_MRNA	29545	0.00313815	2.21937
HNRPA0	BT029819	EMBL	18343	0.00107427	2.22002
PAPOLA	X63436	EMBL	3383	0.00552434	2.22159
CAPZB	NM_176648	REFSEQ_MRNA	23523	0.00384212	2.22232
KIAA0196	XM_002692622	REFSEQ_MRNA_PREDICTED	11407	0.00364468	2.22687
LPCAT4	NM_001077901	REFSEQ_MRNA	9042	0.00134561	2.22819
MYO1B	NM_001102199	REFSEQ_MRNA	6203	0.00467351	2.22838
EXT1	NM_001098095	REFSEQ_MRNA	14422	0.00644674	2.23782
G3PDH	NM_001034034	REFSEQ_MRNA	24581	0.009697	2.23802
RNPS1	NM_001101841	REFSEQ_MRNA	31686	0.00041973	2.23841
SLC25A44	NM_001077857	REFSEQ_MRNA	34449	0.0012886	2.23874
SSR1	NM_001102122	REFSEQ_MRNA	37867	0.00216639	2.23952
AP2M1	NM_001034523	REFSEQ_MRNA	7271	0.00419712	2.24013
MED4	NM_001034486	REFSEQ_MRNA	22250	0.003228	2.24352
RAI14	XM_604226	REFSEQ_MRNA_PREDICTED	36190	0.00555302	2.2465
SLC16A4	NM_001101123	REFSEQ_MRNA	1133	0.00038564	2.24799
SRSF3	NM_001034700	REFSEQ_MRNA	23762	0.00305998	2.25042
PALM	XM_002689163	REFSEQ_MRNA_PREDICTED	13204	0.00344959	2.25721
ZC3H14	NM_001166302	REFSEQ_MRNA	27804	0.00135693	2.26113
PCGF5	NM_001077980	REFSEQ_MRNA	3491	0.0035957	2.26629
CMPK1	NM_001046044	REFSEQ_MRNA	21148	0.00961984	2.26664
MICU1	NM_001075338	REFSEQ_MRNA	5890	0.00787312	2.26743
H2AFV	NM_001038197	REFSEQ_MRNA	16077	0.00133172	2.28295
BTA-MIR-6518	NM_173888	REFSEQ_MRNA	8264	0.00767328	2.2854
PARVA	NM_001099144	REFSEQ_MRNA	3221	0.00092501	2.28586
MRFAP1	NM_001035344	REFSEQ_MRNA	18452	0.00296011	2.28924
UAP1	NM_001046404	REFSEQ_MRNA	27903	0.00555462	2.29205
USF2	NM_001001162	REFSEQ_MRNA	19257	0.00461724	2.2931
DEK	NM_001099717	REFSEQ_MRNA	7389	0.00443057	2.29953
BTA-MIR-2882	NM_001105614	REFSEQ_MRNA	16764	0.00218738	2.30085
LSM4	NM_001035436	REFSEQ_MRNA	18496	0.00235073	2.3033
PTK2	NM_001075250	REFSEQ_MRNA	8097	0.00312728	2.30413
RSU1	NM_001040601	REFSEQ_MRNA	6414	0.00177985	2.30562
RNF25	NM_001015575	REFSEQ_MRNA	3375	0.00769382	2.30583
CSNK2B	NM_001046454	REFSEQ_MRNA	10040	0.00924771	2.31057
FN3KRP	NM_001076399	REFSEQ_MRNA	36539	0.00687303	2.32715
CREBZF	NM_001099088	REFSEQ_MRNA	9749	0.00490785	2.3274
PRPF3	NM_001046051	REFSEQ_MRNA	35674	0.00138844	2.33235
TCP1	NM_001038086	REFSEQ_MRNA	9368	0.00081498	2.33881
SNW1	NM_001077834	REFSEQ_MRNA	27158	0.00322969	2.33883
PTBP1	NM_174442	REFSEQ_MRNA	16392	0.00071488	2.34587
DDX31	NM_001101886	REFSEQ_MRNA	7220	0.00739741	2.34595
TWSG1	NM_001076089	REFSEQ_MRNA	22792	0.00742234	2.35299
RNF139	XM_001255521	REFSEQ_MRNA_PREDICTED	5120	0.00439328	2.3563
TBC1D9B	NM_001101999	REFSEQ_MRNA	33451	0.00347925	2.35856
ACOX2	NM_001102015	REFSEQ_MRNA	6327	0.00861091	2.37043
OAT	NM_001034240	REFSEQ_MRNA	39223	0.00623084	2.37139
LIN7C	NM_001075431	REFSEQ_MRNA	33951	0.0028529	2.3733
TARBP1	XM_614988	REFSEQ_MRNA_PREDICTED	41357	0.00181317	2.37798
NUTF2	NM_001037624	REFSEQ_MRNA	6790	0.00028789	2.38362
RPL31	NM_001025341	REFSEQ_MRNA	17557	0.00506861	2.38533
TCEA1	NM_001045925	REFSEQ_MRNA	35187	0.00249689	2.38659
GSN	NM_001113284	REFSEQ_MRNA	22462	0.0098369	2.39302
CUL2	NM_001076909	REFSEQ_MRNA	8753	0.00088673	2.39352
SMN1	NM_175701	REFSEQ_MRNA	6788	0.00315409	2.39685
WDR26	NM_001077059	REFSEQ_MRNA	13917	0.00813762	2.40088
INVS	NM_001077983	REFSEQ_MRNA	3563	0.0040356	2.4089
NONO	NM_001046554	REFSEQ_MRNA	28648	0.00817375	2.40922
PITPNB	NM_001078040	REFSEQ_MRNA	13813	0.00919111	2.41214
FCHSD2	XM_867197	REFSEQ_MRNA_PREDICTED	8745	0.00592244	2.41712
TAX1BP1	NM_001046409	REFSEQ_MRNA	41127	0.00555083	2.42258
CD3G	NM_001040472	REFSEQ_MRNA	3314	0.00969326	2.42264
SSBP3	NM_001104986	REFSEQ_MRNA	7194	0.00210297	2.42522
EIF3J	NM_001076143	REFSEQ_MRNA	23376	0.00084817	2.42523
ARMCX6	NM_001078125	REFSEQ_MRNA	6836	0.00907666	2.4291
ATXN10	NM_001077051	REFSEQ_MRNA	22467	0.00536913	2.43255
BTF3	NM_001025314	REFSEQ_MRNA	11694	0.00139187	2.4332
ATP6V1H	NM_174704	REFSEQ_MRNA	22564	0.00189397	2.43639
SEC23A	NM_001081604	REFSEQ_MRNA	476	0.00133202	2.43764
NPC1	NM_174758	REFSEQ_MRNA	4956	0.00377429	2.44464
SPAG6	NM_001038185	REFSEQ_MRNA	2856	0.00110534	2.44612
SECTM1	NM_001102326	REFSEQ_MRNA	27346	0.0005907	2.44952
PPM1A	NM_174429	REFSEQ_MRNA	19716	0.00269899	2.44977
MLLT4	XM_581038	REFSEQ_MRNA_PREDICTED	6764	8.188e-05	2.45302
CCT4	NM_001038194	REFSEQ_MRNA	18312	0.00054548	2.45475
PCBP2	NM_001034711	REFSEQ_MRNA	19708	0.00546925	2.45977
LZTFL1	NM_001034425	REFSEQ_MRNA	6962	0.00835242	2.46263
VIM	NM_173969	REFSEQ_MRNA	27776	0.00418945	2.46704
ADPGK	NM_001082438	REFSEQ_MRNA	26551	0.00580147	2.46924
HERPUD2	NM_001075558	REFSEQ_MRNA	32558	0.00232845	2.47081
CCNY	NM_001102268	REFSEQ_MRNA	43714	0.00157126	2.47086
RBM18	NM_001034324	REFSEQ_MRNA	5540	0.00055001	2.47105
TMPO	NM_001098005	REFSEQ_MRNA	11070	0.00223037	2.47332
PLEKHA5	XM_002687754	REFSEQ_MRNA_PREDICTED	39848	0.0002055	2.47999
LRP5	XM_002699405	REFSEQ_MRNA_PREDICTED	9271	0.00413219	2.48191
ARIH1	NM_001081714	REFSEQ_MRNA	16273	0.00175233	2.48229
PARP1	NM_174751	REFSEQ_MRNA	32987	0.00472919	2.48307
HSP90B1	NM_174700	REFSEQ_MRNA	10803	0.00029462	2.4852
CIAO1	NM_001037482	REFSEQ_MRNA	16527	0.00362387	2.48849
GOT2	NM_174806	REFSEQ_MRNA	6983	0.00166198	2.48892
VAV3	XM_002686162	REFSEQ_MRNA_PREDICTED	39916	0.00239923	2.48963
FTCDNL1	XM_002703684	REFSEQ_MRNA_PREDICTED	3213	0.00649135	2.49099
BXDC5	NM_001083417	REFSEQ_MRNA	10347	0.00114961	2.4928
SFN	NM_001075912	REFSEQ_MRNA	4549	0.00122861	2.4939
C3ORF52	XM_865244	REFSEQ_MRNA_PREDICTED	3878	0.0022596	2.49669
MIER1	NM_001076913	REFSEQ_MRNA	34056	0.00678488	2.50178
VDAC2	NM_174486	REFSEQ_MRNA	39429	0.0004332	2.50614
MAT2A	NM_001101131	REFSEQ_MRNA	16875	0.00274182	2.50789
MPHOSPH10	NM_001046317	REFSEQ_MRNA	14533	0.0043866	2.50908
RPS24	NM_001025339	REFSEQ_MRNA	959	0.00456807	2.50936
SSR2	NM_001015533	REFSEQ_MRNA	38264	0.00665293	2.53021
CHRD	XM_001788437	REFSEQ_MRNA_PREDICTED	14010	0.00025815	2.53502
ATP6V1E1	NM_174810	REFSEQ_MRNA	6276	0.00158143	2.53788
PPP1R11	NM_001100295	REFSEQ_MRNA	1743	0.00531004	2.53915
PDCD10	NM_001075259	REFSEQ_MRNA	20990	0.00082374	2.54703
PAPOLG	NM_001098066	REFSEQ_MRNA	15661	0.00060762	2.54743
RPS13	NM_001025342	REFSEQ_MRNA	2827	0.00079007	2.55278
PIK3R4	NM_001100314	REFSEQ_MRNA	15199	0.00024309	2.55681
ZDHHC9	NM_001034561	REFSEQ_MRNA	14467	0.00057456	2.56928
FAM188B	NM_001080319	REFSEQ_MRNA	3225	0.00489403	2.57615
BIN2	NM_001083435	REFSEQ_MRNA	22370	0.00179427	2.57617
OS9	NM_001034225	REFSEQ_MRNA	44165	0.00233693	2.57834
PTPRG	NM_001076228	REFSEQ_MRNA	1248	0.00215266	2.5837
RPL14	NM_001034674	REFSEQ_MRNA	23263	0.00688884	2.58906
MOCS3	NM_001081734	REFSEQ_MRNA	1607	0.00219809	2.59231
DPYD	NM_174041	REFSEQ_MRNA	3636	0.00732513	2.59422
PITPNA	NM_001046582	REFSEQ_MRNA	26768	0.00620632	2.59619
ZYG11B	NM_001102247	REFSEQ_MRNA	2926	0.00562356	2.59783
TPM3	NM_001011674	REFSEQ_MRNA	28242	0.00423445	2.59911
ELMO1	NM_001113227	REFSEQ_MRNA	15891	0.00373314	2.60044
RHOB	NM_001077922	REFSEQ_MRNA	45119	0.00414213	2.60108
MYL12B	NM_001083764	REFSEQ_MRNA	14116	0.0020413	2.60327
RAB14	NM_001130754	REFSEQ_MRNA	8500	0.00026716	2.60507
MARK2	NM_001102182	REFSEQ_MRNA	12142	0.0016996	2.60777
PKIG	NM_205812	REFSEQ_MRNA	34752	0.00556438	2.61311
PDCD6	NM_001105497	REFSEQ_MRNA	26485	0.00111753	2.61961
TMEM59	NM_001035076	REFSEQ_MRNA	2917	0.00094823	2.62176
ACAD8	NM_001075551	REFSEQ_MRNA	32462	0.00037901	2.63369
EPCAM	NM_001035290	REFSEQ_MRNA	26387	0.00757508	2.63722
VAC14	NM_001082444	REFSEQ_MRNA	2729	0.00335096	2.65113
MTM1	BC148078	EMBL	1971	0.00281944	2.65146
JTB	NM_001100360	REFSEQ_MRNA	16140	0.0005662	2.66046
HRH3	XM_002692258	REFSEQ_MRNA_PREDICTED	27820	6.86e-05	2.66456
EEF2	NM_001075121	REFSEQ_MRNA	20956	0.00086384	2.6769
STARD3NL	NM_001075427	REFSEQ_MRNA	18163	0.00436511	2.67723
UBA1	NM_001102477	REFSEQ_MRNA	40266	0.00027757	2.67727
PPIB	NM_174152	REFSEQ_MRNA	5191	0.00409501	2.68024
ATP6V0D1	NM_174505	REFSEQ_MRNA	21633	0.00433462	2.68565
METTL2	NM_001075246	REFSEQ_MRNA	3138	0.00352904	2.6909
RPL7	NM_001014928	REFSEQ_MRNA	35186	0.00018287	2.69958
SMPDL3A	NM_001035019	REFSEQ_MRNA	2278	0.00459337	2.70267
PA2G4	NM_001034699	REFSEQ_MRNA	1830	0.00191453	2.70604
PDCL	NM_174759	REFSEQ_MRNA	606	0.00741558	2.71469
RPL15	NM_001077866	REFSEQ_MRNA	1680	0.00124837	2.72014
PACSIN2	NM_001046468	REFSEQ_MRNA	33283	0.00144026	2.7236
FLT3	XM_002691856	REFSEQ_MRNA_PREDICTED	4326	0.00405827	2.74723
DNAJC8	XM_001788890	REFSEQ_MRNA_PREDICTED	1197	0.0008259	2.75936
CEP85	XM_002685702	REFSEQ_MRNA_PREDICTED	35383	0.00108252	2.76559
CTNNA1	NM_001035366	REFSEQ_MRNA	18758	0.00023772	2.7687
KHDRBS1	NM_001046442	REFSEQ_MRNA	22386	0.00185738	2.76919
YWHAQ	NM_001078127	REFSEQ_MRNA	29544	0.00092248	2.76957
RPL6	NM_001031756	REFSEQ_MRNA	20985	0.00072173	2.77418
B2M	AY911322	EMBL	14657	0.00164446	2.78216
GDI1	NM_174064	REFSEQ_MRNA	24867	0.00943431	2.79179
ARL4A	NM_001076985	REFSEQ_MRNA	27086	0.00588651	2.80034
ANKRD11	XM_612059	REFSEQ_MRNA_PREDICTED	34253	0.00044618	2.80183
MAPRE1	NM_001075334	REFSEQ_MRNA	8676	0.00342886	2.80751
RPS8	NM_001025317	REFSEQ_MRNA	27285	0.00220304	2.82264
RPS3A	NM_001034038	REFSEQ_MRNA	18951	0.00056116	2.82669
IKZF3	NM_001081613	REFSEQ_MRNA	3121	0.00806368	2.84196
CHMP5	NM_001034682	REFSEQ_MRNA	13684	7.3e-05	2.85186
DPM1	NM_001076013	REFSEQ_MRNA	32200	0.00010902	2.85913
LGMN	NM_174101	REFSEQ_MRNA	33723	0.00070386	2.85921
RPL10A	NM_001015647	REFSEQ_MRNA	26858	0.00023361	2.86045
ITGAD	NM_001102496	REFSEQ_MRNA	407	0.00198418	2.86132
CHCHD3	NM_001035475	REFSEQ_MRNA	23112	0.00035923	2.86284
SEPT2	NM_001046092	REFSEQ_MRNA	14786	0.00095044	2.86334
TALDO1	NM_001035283	REFSEQ_MRNA	19046	0.00560935	2.86867
TMEM97	NM_001034403	REFSEQ_MRNA	806	0.00208155	2.87075
C7H19ORF43	NM_001083371	REFSEQ_MRNA	15933	0.00058511	2.887
CYP20A1	NM_001015644	REFSEQ_MRNA	19609	0.00077863	2.8871
ARF1	NM_176653	REFSEQ_MRNA	33784	3.332e-05	2.89496
YWHAZ	NM_174814	REFSEQ_MRNA	17229	0.0012649	2.89956
CD2	NM_001011676	REFSEQ_MRNA	29291	0.00833132	2.90423
SART3	NM_001101860	REFSEQ_MRNA	10274	9.894e-05	2.90469
USP10	NM_001098924	REFSEQ_MRNA	13931	5.309e-05	2.91802
RPN1	NM_001082605	REFSEQ_MRNA	6967	0.00209728	2.91866
C17ORF80	XM_588503	REFSEQ_MRNA_PREDICTED	5587	0.00158865	2.94375
DDX5	BC103318	EMBL	12589	0.00124345	2.9475
F7	NM_001034806	REFSEQ_MRNA	5761	6.312e-05	2.9527
STRAP	NM_001015567	REFSEQ_MRNA	35061	0.00266468	2.99252
KDM4B	XM_002688920	REFSEQ_MRNA_PREDICTED	22712	0.00290313	3.03561
LDHB	NM_174100	REFSEQ_MRNA	18399	8.978e-05	3.03581
GORASP2	NM_001038535	REFSEQ_MRNA	817	0.00013399	3.04074
NCL	AY225854	EMBL	16758	0.00023955	3.04465
ARID2	XM_002687323	REFSEQ_MRNA_PREDICTED	20703	0.00025837	3.05118
ULK3	NM_001045934	REFSEQ_MRNA	9067	0.00263044	3.06125
TSPAN3	NM_001035487	REFSEQ_MRNA	9563	0.00077323	3.07552
RPL10	NM_174760	REFSEQ_MRNA	1760	0.00284437	3.09169
MTUS1	NM_001075692	REFSEQ_MRNA	31952	0.00864182	3.10546
CFL1	NM_001015655	REFSEQ_MRNA	20992	0.00493173	3.16633
CLSTN1	XM_592305	REFSEQ_MRNA_PREDICTED	43393	2.545e-05	3.17684
ST13	NM_001101926	REFSEQ_MRNA	4372	0.00069771	3.17686
RPS4Y1	NM_001082422	REFSEQ_MRNA	40814	0.00053682	3.18292
CASP6	NM_001035419	REFSEQ_MRNA	289	0.00021069	3.19124
LIG3	NM_001038107	REFSEQ_MRNA	3860	0.0001485	3.19903
ACO1	NM_001075591	REFSEQ_MRNA	3929	0.00058408	3.20989
NSA2	NM_001034546	REFSEQ_MRNA	3453	0.00105935	3.21237
MYC	NM_001046074	REFSEQ_MRNA	12894	0.0025395	3.22099
COPS5	XM_001249855	REFSEQ_MRNA_PREDICTED	1420	0.00014236	3.22352
GPS2	NM_001075774	REFSEQ_MRNA	1814	0.00435977	3.2344
CSDA	NM_001098074	REFSEQ_MRNA	18587	0.00763066	3.23571
FAM214A	XM_601152	REFSEQ_MRNA_PREDICTED	38870	0.00106876	3.23658
ATP5C1	NM_001075136	REFSEQ_MRNA	5172	0.00138976	3.23881
RPL18A	NM_001033619	REFSEQ_MRNA	21642	0.00585576	3.24584
RWDD4A	NM_001076824	REFSEQ_MRNA	4230	0.00058517	3.26863
PSME1	NM_001024509	REFSEQ_MRNA	9857	9.222e-05	3.2804
RPS15	NM_001024541	REFSEQ_MRNA	32796	0.00309361	3.28414
VDAC1	NM_174485	REFSEQ_MRNA	28208	0.00075147	3.29037
INTS4	NM_001110065	REFSEQ_MRNA	8496	0.00201997	3.29113
SCAMP2	NM_001102170	REFSEQ_MRNA	26909	0.00058038	3.29155
NACA	NM_001014916	REFSEQ_MRNA	9652	0.00011797	3.30616
GOLPH3	NM_001075948	REFSEQ_MRNA	6268	0.00030182	3.34093
HSPA8	NM_174345	REFSEQ_MRNA	31519	1.428e-05	3.38119
COPB1	NM_001078007	REFSEQ_MRNA	21672	0.00104966	3.42401
HIF1A	NM_174339	REFSEQ_MRNA	16786	0.00565117	3.50091
XBP1	NM_001034727	REFSEQ_MRNA	12824	0.00058614	3.51334
ARGLU1	NM_001038190	REFSEQ_MRNA	18431	0.00335669	3.52255
RAD54L	NM_001130766	REFSEQ_MRNA	1525	0.00271215	3.525
EIF2S2	NM_001015621	REFSEQ_MRNA	17899	0.00857929	3.52763
MGC157319	NM_001102158	REFSEQ_MRNA	24224	0.00095719	3.55534
EIF3H	NM_001025322	REFSEQ_MRNA	11884	0.00031082	3.58256
AMD1	NM_173990	REFSEQ_MRNA	6181	0.00018205	3.61607
EIF1	NM_001014884	REFSEQ_MRNA	5694	5.8e-06	3.67361
YWHAE	NM_174491	REFSEQ_MRNA	12900	0.00097676	3.72034
PSMD1	NM_001101077	REFSEQ_MRNA	42219	0.00095436	3.73165
C16H1ORF21	NM_001081547	REFSEQ_MRNA	4066	0.00401014	3.73234
IFNGR1	NM_001035063	REFSEQ_MRNA	16301	0.0005061	3.83946
RBM5	NM_001046374	REFSEQ_MRNA	20203	9.989e-05	3.8434
RNASE4	NM_001040590	REFSEQ_MRNA	27135	0.00036377	3.85696
FBXO11	NM_001101894	REFSEQ_MRNA	13656	0.00064871	3.87009
RPL19	NM_001040516	REFSEQ_MRNA	33032	0.00020627	3.92072
HSP90AA1	NM_001012670	REFSEQ_MRNA	30239	0.00093771	3.97995
SNX10	NM_001075375	REFSEQ_MRNA	1003	0.00726715	3.99941
ACTB	NM_173979	REFSEQ_MRNA	14911	0.00052934	4.02184
SNX3	NM_001079778	REFSEQ_MRNA	6672	0.00019981	4.04776
RPN2	NM_001034604	REFSEQ_MRNA	9191	0.00310675	4.05973
RPS6	NM_001015548	REFSEQ_MRNA	14679	7.479e-05	4.26348
ACSS2	NM_001105339	REFSEQ_MRNA	34995	0.00060671	4.45509
HNRPH2	NM_001076008	REFSEQ_MRNA	18231	0.00256479	4.4768
FAM120A	NM_001098905	REFSEQ_MRNA	14151	0.00012092	4.51867
LTF	NM_180998	REFSEQ_MRNA	16620	0.00596006	4.55916
SFRS5	NM_001098929	REFSEQ_MRNA	14324	1.507e-05	4.57017
CSDE1	NM_001098025	REFSEQ_MRNA	17501	5.794e-05	5.06641
RPLP0	NM_001012682	REFSEQ_MRNA	10364	0.00012209	5.20167
PPIA	NM_178320	REFSEQ_MRNA	24548	4.038e-05	5.53432
CORO1C	NM_001081590	REFSEQ_MRNA	5854	0.00115347	5.71584
RPS4	NM_001035445	REFSEQ_MRNA	6333	0.00020746	5.72541
ACTG1	NM_001033618	REFSEQ_MRNA	13745	0.00420455	6.98553
EEF1A1	NM_174535	REFSEQ_MRNA	8494	0.00020801	7.42308
